# Supplementary material for: Long-runout landslides with associated longitudinal ridges in Iceland as analogues of Martian landslide deposits
Source: Copernicus journal article supplement (doi:10.5194/esurf-12-657-2024), 2024-05-06
Supplement: Supplementary file 1 [file esurf-12-657-2024-supplement.pdf]

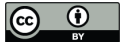

*Supplement of*

## **Long-runout landslides with associated longitudinal ridges in Iceland as analogues of Martian landslide deposits**

**Giulia Magnarini et al.**

*Correspondence to:* Giulia Magnarini ([giulia.magnarini@nhm.ac.uk](mailto:giulia.magnarini@nhm.ac.uk))

The copyright of individual parts of the supplement might differ from the article licence.

## **SUPPLEMENT**

**Supplementary Figures S1 to S2.**

**Supplementary Tables S1 to S4.**

**Visual catalogue of small-scale martian long runout landslides with longitudinal ridges.**

**Supplementary Figures.**

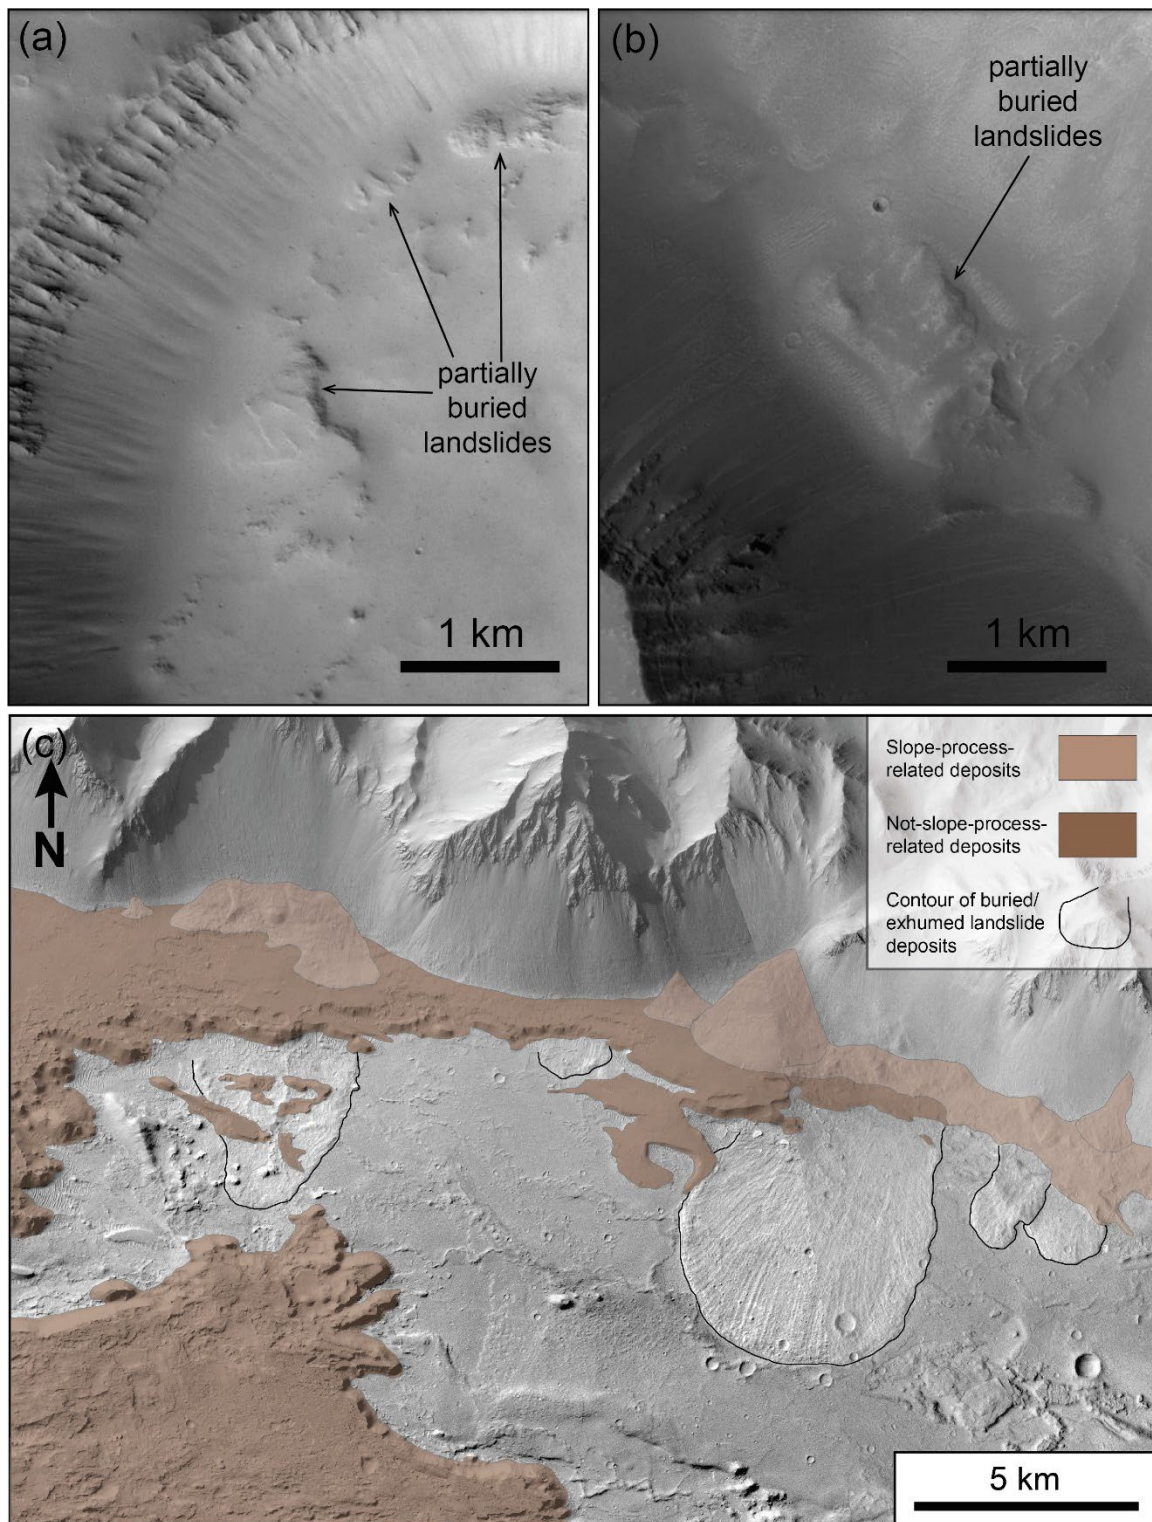

**Figure S1: Examples of buried and exhumed long runout landslides with longitudinal ridges on Mars.** a) location is east of Uranius Patera, unnamed crater: longitude -91.529 latitude 26.274 (CTX image P11\_005426\_2069\_XN\_26N091W). b) location near Noc Cavus, longitude -96.337 latitude -13.78 (CTX image P08\_004055\_1659\_XN\_14S096W). c) The figure shows a sector of Coprates Chasma, in Valles Marineris, where sediments have buried landslide deposits, which have been subsequently exhumed. Base image is CTX image J09\_048254\_1668\_XN\_13S063W.

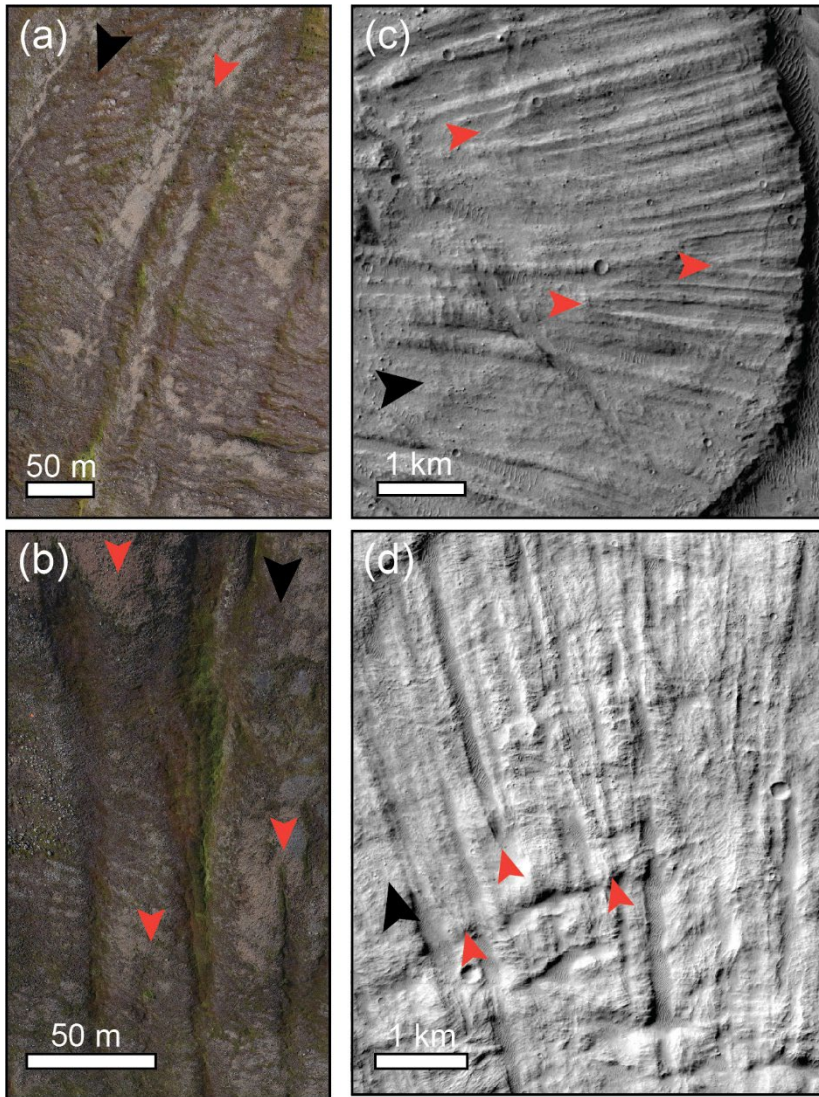

**Figure S2: Ridge splitting.** The red arrowheads show the locations where ridges split and two ridges develop from the parent ridge. Panels a) and b) show examples of ridge splitting in the Dalvik landslide deposit in Iceland. Panels c) (CTX image: P20\_008906\_1685\_XN\_11S067W) and d) (CTX image: B21\_017688\_1685\_XN\_11S067W) show examples of ridge splitting in the 63 km long Coprates Labes landslide deposit on Mars.

## Supplementary Tables.

**Table S1: List of long runout landslides with longitudinal ridges in Iceland.** H is the elevation drop and L is the horizontal length of the landslide. H and L are calculated from the furthest upslope point of the headscarp to the furthest downslope point of the landslide deposit. The elevation data used are derived from the ArcticDEM. The landslide marked with the asterisk and bold font is the Dalvik landslide, which is used as a case study in this work. X stands for 'not present'; Y stands for 'present', and the 'line' symbol is used when identification was uncertain.

| I-Landslide ID | Latitude | Longitude | H (m) | L (m) | H/L   | Toreva block | Lateral Levees | Headscarp |
|----------------|----------|-----------|-------|-------|-------|--------------|----------------|-----------|
| 1              | 66.145   | -23.214   | 302   | 634   | 0.476 | X            | X              | Top-slope |
| 2              | 66.166   | -23.307   | 285   | 757   | 0.376 | X            | X              | Top-slope |
| 3              | 65.883   | -23.357   | 532   | 1390  | 0.382 | X            | X              | Top-slope |
| 4              | 65.777   | -23.45    | 343   | 897   | 0.382 | X            | X              | Top-slope |
| 5              | 65.94    | -21.564   | 155   | 466   | 0.332 | X            | X              | Top-slope |
| 6              | 65.602   | -21.646   | 352   | 993   | 0.354 | X            | Y              | Top-slope |
| 7              | 65.596   | -21.646   | 345   | 968   | 0.349 | X            | X              | Top-slope |
| 8              | 65.512   | -22.281   | 374   | 1041  | 0.359 | X            | X              | Top-slope |
| 9              | 65.513   | -22.261   | 408   | 1065  | 0.383 | X            | X              | Top-slope |
| 10             | 65.483   | -22.133   | 391   | 1922  | 0.203 | X            | X              | Top-slope |
| 11             | 65.451   | -21.85    | 337   | 1464  | 0.230 | X            | X              | Top-slope |
| 12             | 65.481   | -21.506   | 120   | 551   | 0.217 | X            | X              | Top-slope |
| 13             | 65.442   | -21.486   | 271   | 686   | 0.395 | X            | X              | Top-slope |
| 14             | 65.366   | -21.746   | 479   | 1064  | 0.450 | X            | X              | Top-slope |
| 15             | 65.243   | -21.823   | 180   | 1030  | 0.174 | X            | X              | Top-slope |
| 16             | 65.237   | -21.799   | 156   | 744   | 0.209 | Y            | X              | Top-slope |
| 17             | 65.24    | -21.792   | 209   | 1328  | 0.157 | X            | Y              | Top-slope |
| 18             | 64.9     | -23.064   | 196   | 1310  | 0.149 | X            | X              | Top-slope |
| 19             | 64.867   | -22.959   | 243   | 987   | 0.246 | X            | X              | Mid-slope |
| 20             | 64.991   | -22.591   | 274   | 930   | 0.294 | Y            | X              | Top-slope |
| 21             | 64.974   | -22.604   | 204   | 514   | 0.396 | X            | X              | Top-slope |
| 22             | 64.985   | -22.582   | 221   | 717   | 0.308 | X            | X              | Top-slope |

|            |               |               |            |             |              |          |          |                  |
|------------|---------------|---------------|------------|-------------|--------------|----------|----------|------------------|
| -23        | 64.898        | -22.075       | 295        | 1160        | 0.254        | -        | X        | Top-slope        |
| 24         | 64.895        | -22.047       | 261        | 806         | 0.323        | -        | X        | Top-slope        |
| 25         | 64.959        | -21.757       | 450        | 1401        | 0.321        | X        | X        | Top-slope        |
| 26         | 64.891        | -21.513       | 99         | 347         | 0.285        | X        | X        | Mid-slope        |
| 27         | 64.845        | -21.73        | 300        | 1230        | 0.243        | Y        | X        | Top-slope        |
| 28         | 64.839        | -21.734       | 348        | 1534        | 0.226        | Y        | X        | Top-slope        |
| 29         | 65.061        | -21.305       | 226        | 843         | 0.268        | X        | X        | Top-slope        |
| 30         | 64.211        | -21.695       | 318        | 1540        | 0.206        | X        | X        | Mid-slope        |
| 31         | 65.396        | -20.433       | 522        | 2130        | 0.245        | X        | Y        | Top-slope        |
| 32         | 65.414        | -20.743       | 460        | 2279        | 0.201        | X        | -        | Top-slope        |
| 33         | 65.536        | -20.669       | 365        | 1443        | 0.252        | X        | X        | Top-slope        |
| 34         | 65.452        | -20.222       | 401        | 1720        | 0.233        | X        | X        | Top-slope        |
| 35         | 65.521        | -20.325       | 220        | 726         | 0.303        | X        | X        | Mid-slope        |
| 36         | 65.575        | -19.998       | 226        | 849         | 0.266        | -        | N        | Mid-slope        |
| 37         | 65.583        | -20.028       | 251        | 874         | 0.287        | -        | N        | Top-slope        |
| 38         | 65.597        | -20.069       | 452        | 1243        | 0.363        | X        | X        | Top-slope        |
| 39         | 65.606        | -20.083       | 527        | 1194        | 0.441        | X        | X        | Top-slope        |
| 40         | 65.58         | -20.013       | 317        | 1178        | 0.269        | -        | N        | Top-slope        |
| 41         | 66.138        | -19.052       | 438        | 1738        | 0.252        | X        | X        | Top-slope        |
| 42         | 66.091        | -18.719       | 486        | 831         | 0.580        | X        | X        | Top-slope        |
| 43         | 66.031        | -18.7         | 810        | 2469        | 0.328        | -        | N        | Top-slope        |
| 44         | 66.094        | -19.051       | 243        | 834         | 0.291        | N        | Y        | Top-slope        |
| 45         | 66.07         | -18.996       | 245        | 1131        | 0.216        | Y        | N        | Top-slope        |
| 46         | 66.066        | -18.964       | 288        | 1033        | 0.278        | Y        | N        | Top-slope        |
| <b>47*</b> | <b>65.981</b> | <b>-18.56</b> | <b>480</b> | <b>1210</b> | <b>0.396</b> | <b>Y</b> | <b>N</b> | <b>Top-slope</b> |
| 48         | 66.024        | -18.931       | 232        | 1307        | 0.177        | Y        | N        | Top-slope        |
| 49         | 66.015        | -18.994       | 283        | 1188        | 0.238        | X        | X        | Top-slope        |
| 50         | 65.984        | -19.162       | 415        | 965         | 0.430        | -        | N        | Top-slope        |

|    |        |         |     |      |       |   |   |           |
|----|--------|---------|-----|------|-------|---|---|-----------|
| 51 | 66.078 | -18.843 | 167 | 707  | 0.236 | X | X | Mid-slope |
| 52 | 66.083 | -18.837 | 103 | 412  | 0.250 | X | X | Mid-slope |
| 53 | 66.033 | -18.934 | 115 | 468  | 0.245 | X | X | Mid-slope |
| 54 | 66.002 | -18.982 | 273 | 786  | 0.347 | X | X | Mid-slope |
| 55 | 66.005 | -19.127 | 307 | 921  | 0.333 | - | N | Top-slope |
| 56 | 65.945 | -19.083 | 516 | 1208 | 0.427 | Y | N | Top-slope |
| 57 | 66.02  | -19.17  | 317 | 981  | 0.323 | N | N | Mid-slope |
| 58 | 65.949 | -18.088 | 548 | 1444 | 0.379 | N | Y | Top-slope |
| 59 | 65.946 | 19.015  | 203 | 1290 | 0.157 | N | N | Mid-slope |
| 60 | 65.941 | -19.001 | 198 | 865  | 0.228 | N | Y | Mid-slope |
| 61 | 65.945 | -18.83  | 175 | 966  | 0.181 | - | Y | Mid-slope |
| 62 | 65.948 | -18.768 | 396 | 1781 | 0.222 | N | N | Top-slope |
| 63 | 65.929 | -18.755 | 328 | 853  | 0.384 | Y | - | Mid-slope |
| 64 | 65.94  | -18.762 | 418 | 1592 | 0.262 | N | Y | Mid-slope |
| 65 | 65.937 | -18.767 | 455 | 1037 | 0.438 | N | Y | Top-slope |
| 66 | 65.915 | -18.96  | 575 | 1484 | 0.387 | Y | N | Top-slope |
| 67 | 65.933 | -19.381 | 361 | 1080 | 0.334 | - | N | Top-slope |
| 68 | 65.922 | -19.364 | 358 | 1025 | 0.349 | N | N | Mid-slope |
| 69 | 65.956 | -19.401 | 235 | 678  | 0.346 | - | N | Mid-slope |
| 70 | 65.885 | -19.153 | 526 | 1511 | 0.348 | - | N | Mid-slope |
| 71 | 65.78  | -19.216 | 576 | 2409 | 0.239 | Y | Y | Top-slope |
| 72 | 65.946 | -18.637 | 270 | 886  | 0.304 | Y | Y | Mid-slope |
| 73 | 65.941 | -18.638 | 377 | 786  | 0.479 | N | - | Mid-slope |
| 74 | 65.902 | -18.536 | 434 | 1532 | 0.283 | Y | Y | Mid-slope |
| 75 | 65.869 | -18.68  | 298 | 850  | 0.350 | Y | Y | Mid-slope |
| 76 | 65.9   | -18.677 | 355 | 1057 | 0.335 | N | - | Mid-slope |
| 77 | 65.9   | -18.667 | 479 | 1374 | 0.348 | - | - | Mid-slope |
| 78 | 65.917 | -18.514 | 377 | 1455 | 0.259 | N | - | Mid-slope |

|     |        |         |     |      |       |   |   |           |
|-----|--------|---------|-----|------|-------|---|---|-----------|
| 79  | 65.869 | -18.7   | 452 | 1034 | 0.437 | N | N | Mid-slope |
| 80  | 65.868 | -18.69  | 310 | 894  | 0.346 | N | N | Mid-slope |
| 81  | 65.674 | -19.331 | 513 | 1487 | 0.344 | - | - | Mid-slope |
| 82  | 65.587 | -18.765 | 302 | 674  | 0.448 | - | N | Mid-slope |
| 83  | 65.48  | -18.67  | 180 | 523  | 0.344 | - | N | Mid-slope |
| 84  | 65.521 | -18.47  | 229 | 666  | 0.343 | - | N | Mid-slope |
| 85  | 65.473 | -18.696 | 226 | 472  | 0.478 | - | N | Mid-slope |
| 86  | 65.578 | 18.7    | 245 | 807  | 0.303 | N | N | Mid-slope |
| 87  | 65.678 | -18.327 | 323 | 1057 | 0.305 | N | N | Mid-slope |
| 88  | 65.515 | -18.204 | 437 | 1162 | 0.376 | - | N | Top-slope |
| 89  | 65.668 | -18.374 | 738 | 2258 | 0.326 | N | N | Top-slope |
| 90  | 65.559 | -18.191 | 112 | 573  | 0.195 | N | N | Mid-slope |
| 91  | 65.546 | -18.181 | 564 | 1542 | 0.365 | - | Y | Mid-slope |
| 92  | 65.503 | -18.315 | 225 | 620  | 0.362 | Y | N | Mid-slope |
| 93  | 65.503 | -18.276 | 541 | 1547 | 0.349 | - | N | Top-slope |
| 94  | 65.506 | -18.257 | 257 | 659  | 0.389 | Y | N | Mid-slope |
| 95  | 65.547 | -17.936 | 221 | 566  | 0.390 | N | N | Mid-slope |
| 96  | 65.608 | -17.829 | 103 | 379  | 0.271 | Y | N | Mid-slope |
| 97  | 65.561 | -17.76  | 240 | 969  | 0.247 | Y | N | Mid-slope |
| 98  | 65.832 | -17.861 | 516 | 1703 | 0.302 | Y | N | Top-slope |
| 99  | 65.83  | -18.052 | 518 | 1669 | 0.310 | Y | - | Top-slope |
| 100 | 65.889 | -17.811 | 436 | 1607 | 0.271 | Y | N | Mid-slope |
| 101 | 65.986 | -17.822 | 437 | 1937 | 0.225 | Y | - | Top-slope |
| 102 | 65.897 | -17.824 | 615 | 2573 | 0.239 | Y | N | Mid-slope |
| 103 | 65.678 | -14.81  | 763 | 2629 | 0.290 | Y | N | Top-slope |
| 104 | 65.669 | -14.813 | 274 | 827  | 0.331 | Y | N | Mid-slope |
| 105 | 65.581 | -13.966 | 340 | 1159 | 0.293 | N | Y | Top-slope |
| 106 | 65.549 | -13.967 | 444 | 1851 | 0.239 | N | N | Top-slope |



|     |        |         |     |      |       |   |   |           |
|-----|--------|---------|-----|------|-------|---|---|-----------|
| 107 | 65.532 | -13.727 | 173 | 1008 | 0.171 | - | - | Top-slope |
| 108 | 65.513 | -13.772 | 491 | 1839 | 0.266 | N | Y | Top-slope |
| 109 | 65.51  | -13.706 | 357 | 1673 | 0.213 | N | Y | Top-slope |
| 110 | 65.168 | -14.267 | 167 | 601  | 0.277 | Y | N | Mid-slope |
| 111 | 65.128 | -13.907 | 272 | 1744 | 0.155 | N | Y | Mid-slope |
| 112 | 65.118 | -13.562 | 214 | 854  | 0.250 | N | N | Mid-slope |
| 113 | 64.863 | -14.207 | 361 | 1133 | 0.318 | Y | N | Top-slope |
| 114 | 64.959 | -14.072 | 189 | 605  | 0.312 | Y | Y | Mid-slope |
| 115 | 64.993 | -14.951 | 442 | 1443 | 0.306 | N | Y | Mid-slope |
| 116 | 64.404 | -15.288 | 267 | 900  | 0.296 | N | Y | Mid-slope |
| 117 | 65.871 | -19.834 | 544 | 1936 | 0.280 | - | Y | Mid-slope |
| 118 | 65.984 | -19.395 | 372 | 1817 | 0.204 | N | N | Top-slope |
| 119 | 66.028 | -19.318 | 106 | 373  | 0.284 | N | N | Mid-slope |
| 120 | 66.036 | -19.321 | 429 | 1445 | 0.296 | N | Y | Top-slope |
| 121 | 65.429 | -20.183 | 188 | 859  | 0.218 | N | N | Top-slope |
| 122 | 65.429 | -20.166 | 302 | 828  | 0.364 | - | Y | Mid-slope |
| 123 | 66.433 | -20.156 | 287 | 1265 | 0.226 | Y | N | Mid-slope |
| 124 | 65.502 | -13.711 | 430 | 1318 | 0.326 | N | N | Top-slope |
| 125 | 65.94  | -18.826 | 549 | 2308 | 0.237 | N | N | Top-slope |
| 126 | 65.578 | -13.999 | 169 | 655  | 0.258 | Y | - | Mid-slope |
| 127 | 65.167 | -14.25  | 91  | 287  | 0.317 | Y | Y | Mid-slope |
| 128 | 65.136 | -13.946 | 328 | 971  | 0.337 | - | - | Mid-slope |
| 129 | 65.574 | -13.996 | 234 | 585  | 0.400 | Y | N | Top-slope |

**Table S2: List of Ground Control Points (GCPs) used to georeference drone-acquired images of the landslide near the town of Dalvík (landslide ID 47).** The height above the geoid [H] corresponds to the elevation above sea level and it is obtained by subtracting the geoid height above the ellipsoid at the given location [N] to the height above the ellipsoid [h], which is elevation provided by the dGPS.

| <b>Point Id</b> | <b>Latitude</b>  | <b>Longitude</b> | <b>Height above the ellipsoid (m) [h]</b> | <b>Geoid height above the ellipsoid (m) [N]</b> | <b>Height above the geoid (m) [H]</b> |
|-----------------|------------------|------------------|-------------------------------------------|-------------------------------------------------|---------------------------------------|
| GCP01           | 65° 58' 50.58" N | 18° 33' 07.09" W | 157.2471                                  | 66.2095                                         | 91.0376                               |
| GCP02           | 65° 58' 46.39" N | 18° 33' 21.90" W | 176.1410                                  | 66.2204                                         | 109.9206                              |
| GCP03           | 65° 58' 46.10" N | 18° 33' 39.24" W | 230.5178                                  | 66.2271                                         | 164.2907                              |
| GCP04           | 65° 58' 54.19" N | 18° 33' 22.74" W | 217.9408                                  | 66.2106                                         | 151.7302                              |
| GCP05           | 65° 58' 56.11" N | 18° 33' 10.49" W | 195.1588                                  | 66.2036                                         | 128.9552                              |
| GCP06           | 65° 59' 00.39" N | 18° 33' 19.87" W | 230.7915                                  | 66.2016                                         | 164.5899                              |
| GCP07           | 65° 58' 54.69" N | 18° 33' 34.43" W | 245.3430                                  | 66.2142                                         | 179.1288                              |
| GCP08           | 65° 58' 47.43" N | 18° 33' 52.50" W | 250.1690                                  | 66.2301                                         | 183.9389                              |
| GCP09           | 65° 58' 54.89" N | 18° 33' 57.50" W | 307.8761                                  | 66.2221                                         | 241.6540                              |
| GCP10           | 65° 59' 03.12" N | 18° 33' 44.07" W | 322.9035                                  | 66.2066                                         | 256.6969                              |

**Table S3: List of long runout landslide less than 5 km long with longitudinal ridges on Mars.** H is the elevation drop and L is the horizontal length of the landslide. H and L are calculated from the furthest point of the headscarp to the furthest point of the landslide deposit. The elevation data used are derived from HRSC MOLA-Blended global DEM. The landslides marked with an asterisk and in bold font are the landslides for which we have built DEMs and orthoimages. X stands for 'not present'; Y stands for 'present', and the 'line' symbol is used when identification was uncertain.

| <b>M-Landslide ID</b> | <b>Latitude</b> | <b>Longitude</b> | <b>H (km)</b> | <b>L (km)</b> | <b>H/L</b> | <b>Toreva block</b> | <b>Lateral levees</b> | <b>Headscarp</b> |
|-----------------------|-----------------|------------------|---------------|---------------|------------|---------------------|-----------------------|------------------|
| 1                     | -11.218         | -177.694         | 0.346         | 2.022         | 0.171      | X                   | -                     | Mid-slope        |
| 2                     | 36.377          | -104.794         | 0.566         | 1.566         | 0.361      | X                   | Y                     | Mid-slope        |
| 3                     | 36.818          | -104.483         | 0.106         | 0.508         | 0.209      | X                   | -                     | Mid-slope        |
| 4                     | -6.386          | -101.555         | 0.527         | 1.285         | 0.410      | X                   | Y                     | Mid-slope        |
| 5                     | -5.585          | -89.658          | 0.286         | 1.242         | 0.23       | X                   | Y                     | Top-slope        |
| 6                     | -6.194          | -89.68           | 0.902         | 4.048         | 0.222      | X                   | Y                     | Top-slope        |
| 7                     | -4.647          | 143.78           | 0.157         | 0.985         | 0.159      | X                   | Y                     | Mid-slope        |
| 8                     | -8.287          | 149.217          | 0.304         | 1.383         | 0.219      | X                   | Y                     | Mid-slope        |
| 9                     | -3.595          | 137.593          | 0.383         | 2.886         | 0.132      | X                   | Y                     | Top-slope        |
| 10                    | 19.115          | 173.191          | 0.682         | 2.492         | 0.273      | X                   | Y                     | Mid-slope        |
| 11                    | 19.079          | 173.174          | 1.341         | 4.204         | 0.318      | Y                   | Y                     | Top-slope        |
| 12                    | -3.519          | -60.348          | 0.845         | 1.805         | 0.468      | X                   | Y                     | Mid-slope        |
| 13                    | -3.681          | 124.201          | 1.110         | 3.344         | 0.331      | Y                   | Y                     | Top-slope        |
| 14                    | -14.725         | -179.832         | 0.174         | 2.287         | 0.076      | Y                   | -                     | Mid-slope        |
| 15                    | -14.723         | -179.846         | 0.315         | 2.111         | 0.128      | X                   | Y                     | Mid-slope        |
| 16                    | -17.844         | -171.051         | 0.399         | 2.904         | 0.137      | X                   | X                     | Top-slope        |
| 17                    | -34.076         | -156.802         | 0.408         | 2.853         | 0.143      | X                   | X                     | Top-slope        |
| 18                    | -10             | -95.096          | 1.165         | 3.327         | 0.35       | X                   | -                     | Top-slope        |
| 19                    | -10.02          | -95.085          | 1.151         | 4.33          | 0.265      | X                   | -                     | Top-slope        |
| 20                    | -27.828         | 155.411          | 0.576         | 3.251         | 0.177      | Y                   | Y                     | Top-slope        |
| 21                    | 37.888          | -103.872         | 1.252         | 3.371         | 0.371      | X                   | Y                     | Top-slope        |
| 22                    | 37.858          | -103.896         | 1.341         | 3.734         | 0.359      | X                   | X                     | Top-slope        |
| 23                    | -4.619          | -72.68           | 0.685         | 3.069         | 0.223      | X                   | -                     | Top-slope        |

|            |                |                |              |              |              |          |          |                  |
|------------|----------------|----------------|--------------|--------------|--------------|----------|----------|------------------|
| 24         | -4.634         | -72.765        | 0.908        | 3.512        | 0.258        | X        | -        | Top-slope        |
| 25         | -19.336        | 165.727        | 0.61         | 3.951        | 0.154        | X        | X        | Top-slope        |
| 26         | -19.969        | 172.27         | 0.78         | 3.373        | 0.231        | Y        | -        | Top-slope        |
| 27         | -19.952        | 172.244        | 0.671        | 4.185        | 0.16         | Y        | -        | Top-slope        |
| 28         | -4.889         | -63.237        | 1.038        | 3.144        | 0.33         | Y        | X        | Top-slope        |
| 29         | 23.618         | -67.337        | 0.964        | 3.528        | 0.273        | X        | Y        | Top-slope        |
| 30         | -11.974        | -68.539        | 0.877        | 3.337        | 0.262        | X        | X        | Top-slope        |
| <b>31*</b> | <b>-4.526</b>  | <b>-84.365</b> | <b>0.943</b> | <b>3.461</b> | <b>0.272</b> | -        | <b>Y</b> | Top-slope        |
| 32         | -4.43          | -84.357        | 1.388        | 4.746        | 0.292        | Y        | Y        | Top-slope        |
| 33         | -4.641         | -63.239        | 0.987        | 3.356        | 0.294        | X        | Y        | Top-slope        |
| 34         | -7.935         | -96.229        | 1.110        | 3.284        | 0.338        | X        | Y        | Top-slope        |
| 35         | -25.854        | -139.877       | 1.369        | 3.566        | 0.383        | X        | -        | Top-slope        |
| 36         | -9.287         | 123.352        | 0.693        | 3.286        | 0.210        | Y        | Y        | Top-slope        |
| 37         | 0.364          | 120.835        | 0.384        | 3.888        | 0.098        | Y        | X        | Top-slope        |
| 38         | -3.87          | -74.366        | 1.708        | 4.210        | 0.405        | X        | Y        | Top-slope        |
| 39         | 3.82           | 131.804        | 0.804        | 4.080        | 0.197        | Y        | Y        | Top-slope        |
| 40         | -7.475         | -89.117        | 1.336        | 3.962        | 0.337        | X        | Y        | Top-slope        |
| 41         | -5.048         | -71.978        | 1.684        | 4.468        | 0.376        | X        | -        | Top-slope        |
| <b>42*</b> | <b>28</b>      | <b>-71.876</b> | <b>1.172</b> | <b>3.868</b> | <b>0.302</b> | <b>Y</b> | <b>Y</b> | Top-slope        |
| 43         | -4.089         | -88.594        | 1.579        | 4.902        | 0.322        | X        | X        | Top-slope        |
| 44         | -21.645        | 169.313        | 0.809        | 4.552        | 0.177        | X        | X        | Top-slope        |
| 45         | -3.551         | 134.13         | 0.797        | 4.373        | 0.182        | -        | Y        | Top-slope        |
| <b>46*</b> | <b>-13.546</b> | <b>-65.321</b> | <b>0.657</b> | <b>4.159</b> | <b>0.157</b> | <b>X</b> | <b>X</b> | <b>Mid-slope</b> |
| <b>47*</b> | <b>-13.553</b> | <b>-65.277</b> | <b>0.8</b>   | <b>4.256</b> | <b>0.187</b> | <b>X</b> | <b>X</b> | <b>Mid-slope</b> |
| 48         | -0.674         | -60.672        | 0.844        | 3.728        | 0.226        | X        | Y        | Top-slope        |
| 49         | 16.064         | -52.719        | 0.415        | 2.076        | 0.199        | -        | Y        | Mid-slope        |
| 50         | 8.811          | -56.122        | 0.413        | 3.492        | 0.118        | Y        | Y        | Top-slope        |
| 51         | 0.377          | -45.565        | 0.284        | 1.278        | 0.222        | X        | Y        | Top-slope        |
| 52         | 0.345          | -45.529        | 0.437        | 1.190        | 0.367        | X        | Y        | Mid-slope        |

|    |        |         |       |       |       |   |   |           |
|----|--------|---------|-------|-------|-------|---|---|-----------|
| 53 | 0.305  | -45.583 | 0.627 | 1.922 | 0.326 | X | Y | Top-slope |
| 54 | 0.022  | -45.388 | 0.881 | 2.279 | 0.386 | - | X | Top-slope |
| 55 | -0.003 | -45.388 | 0.790 | 1.930 | 0.409 | - | X | Top-slope |
| 56 | 0.002  | -44.916 | 0.415 | 2.174 | 0.190 | X | Y | Top-slope |
| 57 | -0.025 | -44.877 | 0.664 | 2.423 | 0.274 | X | Y | Top-slope |
| 58 | 1.657  | -43.837 | 1.269 | 3.468 | 0.365 | X | Y | Top-slope |
| 59 | 6.609  | -42.201 | 1.285 | 4.599 | 0.279 | X | Y | Top-slope |
| 60 | 11.442 | -41.813 | 0.82  | 2.081 | 0.394 | X | - | Top-slope |
| 61 | 10.024 | -41.021 | 0.715 | 2.164 | 0.330 | X | - | Mid-slope |
| 62 | 10.353 | -41.266 | 0.865 | 2.311 | 0.374 | X | X | Top-slope |
| 63 | 10.345 | -41.215 | 1.033 | 3.061 | 0.337 | X | X | Top-slope |
| 64 | 10.399 | -37.866 | 0.536 | 3.120 | 0.171 | X | - | Top-slope |
| 65 | 3.314  | -36.009 | 0.842 | 2.284 | 0.368 | X | Y | Mid-slope |
| 66 | 2.19   | -36.542 | 0.997 | 2.639 | 0.377 | X | - | Mid-slope |
| 67 | 1.509  | -36.287 | 0.351 | 1.021 | 0.343 | X | Y | Mid-slope |
| 68 | 1.198  | -36.02  | 0.409 | 1.232 | 0.331 | X | Y | Mid-slope |
| 69 | 0.833  | -35.17  | 0.211 | 1.148 | 0.183 | X | Y | Top-slope |
| 70 | 1.184  | -34.949 | 0.742 | 2.873 | 0.258 | X | Y | Top-slope |
| 71 | 0.405  | -32.5   | 0.394 | 0.901 | 0.437 | X | - | Mid-slope |
| 72 | 0.886  | -32.606 | 0.679 | 2.902 | 0.233 | X | - | Top-slope |
| 73 | 5.733  | -32.127 | 0.621 | 2.243 | 0.276 | X | - | Top-slope |
| 74 | 11.474 | -32.541 | 0.396 | 2.011 | 0.196 | X | X | Top-slope |
| 75 | 1.634  | -25.697 | 0.667 | 2.075 | 0.321 | Y | Y | Mid-slope |
| 76 | 2.209  | -25.413 | 1.071 | 2.724 | 0.393 | Y | Y | Top-slope |
| 77 | 2.027  | -23.319 | 1.29  | 4.453 | 0.289 | Y | X | Top-slope |
| 78 | 2.529  | -17.756 | 1.73  | 4.633 | 0.373 | X | Y | Top-slope |
| 79 | 2.71   | -17.784 | 0.741 | 1.649 | 0.449 | X | Y | Mid-slope |
| 80 | 2.679  | -17.771 | 0.632 | 1.403 | 0.45  | X | X | Top-slope |
| 81 | 1.034  | -18.207 | 0.858 | 2.429 | 0.353 | X | X | Mid-slope |

|     |         |         |       |       |       |   |   |           |
|-----|---------|---------|-------|-------|-------|---|---|-----------|
| 82  | 4.211   | -17.059 | 0.813 | 2.384 | 0.341 | X | X | Mid-slope |
| 83  | 7.497   | -22.434 | 0.137 | 1.492 | 0.091 | X | X | Top-slope |
| 84  | 22.02   | 77.265  | 0.58  | 2.517 | 0.23  | X | Y | Top-slope |
| 85  | 4.189   | 81.916  | 1.006 | 4.475 | 0.224 | Y | X | Top-slope |
| 86  | 2.427   | 88.447  | 0.898 | 3.873 | 0.231 | X | Y | Mid-slope |
| 87  | -24.735 | 64.339  | 1.231 | 4.123 | 0.298 | X | - | Mid-slope |
| 88  | -15.339 | 83.313  | 0.491 | 3.11  | 0.157 | Y | X | Top-slope |
| 89  | -3.701  | -57.777 | 0.741 | 2.813 | 0.263 | X | X | Top-slope |
| 90  | -1.033  | -42.985 | 0.816 | 3.255 | 0.25  | X | Y | Top-slope |
| 91  | -1.105  | -42.974 | 0.954 | 3.112 | 0.306 | X | - | Top-slope |
| 92  | -6.433  | -48.952 | 0.975 | 2.436 | 0.400 | Y | - | Top-slope |
| 93  | -6.733  | -47.862 | 1.668 | 4.433 | 0.376 | - | Y | Top-slope |
| 94  | -10.594 | -46.425 | 1.445 | 4.742 | 0.304 | Y | Y | Mid-slope |
| 95  | -8.217  | -40.898 | 0.365 | 1.305 | 0.279 | X | - | Mid-slope |
| 96  | -8.219  | -40.911 | 0.243 | 0.928 | 0.261 | X | X | Mid-slope |
| 97  | -16.067 | -45.131 | 0.406 | 1.646 | 0.246 | X | X | Top-slope |
| 98  | -16.986 | -45.148 | 1.104 | 3.767 | 0.293 | Y | Y | Top-slope |
| 99  | -16.42  | -44.02  | 1.082 | 3.123 | 0.346 | - | Y | Top-slope |
| 100 | -16.25  | -43.39  | 1.118 | 3.293 | 0.339 | Y | X | Top-slope |
| 101 | -14.675 | -37.455 | 0.609 | 2.074 | 0.293 | X | X | Mid-slope |
| 102 | -6.213  | -37.651 | 0.978 | 2.534 | 0.385 | X | Y | Mid-slope |
| 103 | -5.762  | -37.895 | 0.65  | 1.763 | 0.368 | X | Y | Mid-slope |
| 104 | -4.939  | -36.084 | 0.359 | 2.212 | 0.162 | - | Y | Top-slope |
| 105 | -4.908  | -36.114 | 0.299 | 1.461 | 0.204 | X | X | Top-slope |
| 106 | -0.459  | -32.403 | 0.274 | 0.961 | 0.285 | X | X | Mid-slope |
| 107 | -0.321  | -32.572 | 0.295 | 1.679 | 0.175 | X | Y | Mid-slope |
| 108 | -0.294  | -22.254 | 0.645 | 2.022 | 0.318 | - | - | Mid-slope |
| 109 | -0.566  | -16.115 | 1.634 | 4.856 | 0.336 | X | - | Top-slope |
| 110 | -4.931  | -18.812 | 1.177 | 4.177 | 0.281 | X | Y | Top-slope |

|     |         |         |       |       |       |   |   |           |
|-----|---------|---------|-------|-------|-------|---|---|-----------|
| 111 | -18.665 | -15.006 | 1.091 | 4.864 | 0.224 | - | X | Top-slope |
| 112 | 0.739   | -32.65  | 0.325 | 1.285 | 0.252 | X | - | Mid-slope |
| 112 | 0.739   | -32.65  | 0.325 | 1.285 | 0.252 | X | - | Mid-slope |

**Table S4: List of CTX image pairs used to generate DEM and orthoimage of two martian landslides.**

| <b>Landslide ID</b> | <b>Image ID</b>                | <b>Pixel size (m)</b> | <b>Incidence angle (°)</b> | <b>Phase angle (°)</b> | <b>Emission angle (°)</b> | <b>Vertical precision (m)</b> |
|---------------------|--------------------------------|-----------------------|----------------------------|------------------------|---------------------------|-------------------------------|
| 31                  | D09_030598_1752_<br>XN_04S084W | 5.39                  | 46.83                      | 55.09                  | 8.82                      | 6.16                          |
|                     | D16_033578_1752_<br>XN_04S084W | 5.26                  | 42.72                      | 43.64                  | 1.11                      |                               |
| 42                  | D21_035252_2083_<br>XN_28N072W | 5.73                  | 42.19                      | 45.49                  | 3.42                      | 7.15                          |
|                     | K20_061019_2082_<br>XI_28N072W | 5.75                  | 39.71                      | 34.05                  | 5.71                      |                               |
| 46, 47              | J16_050944_1665_<br>XN_13S065W | 5.21                  | 41.29                      | 43.27                  | 2.45                      | 2.98                          |
|                     | J16_051089_1665_<br>XN_13S065W | 5.76                  | 42.2                       | 57.88                  | 18.66                     |                               |

**Visual catalogue of small-scale (< 5 km) martian landslides with longitudinal ridges.**

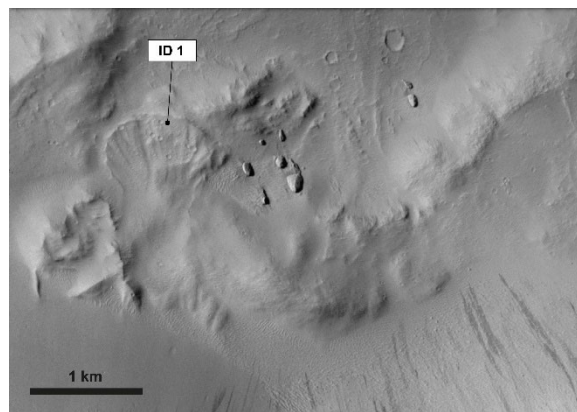

CTX image B02\_010611\_1684\_XN\_11S177W

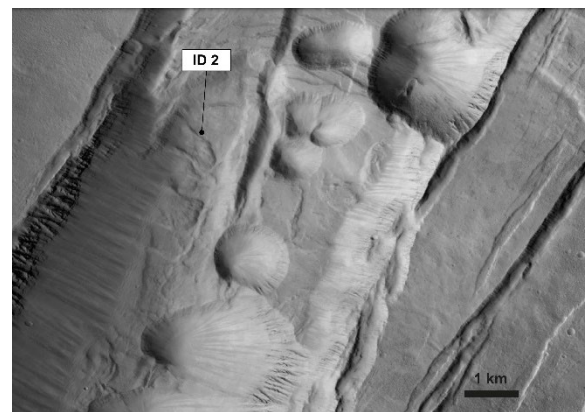

CTX image P16\_007246\_2145\_XN\_34N104W

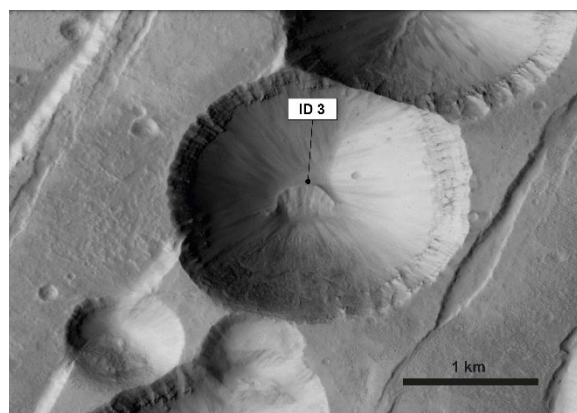

CTX image B20\_017254\_2177\_XN\_37N104W

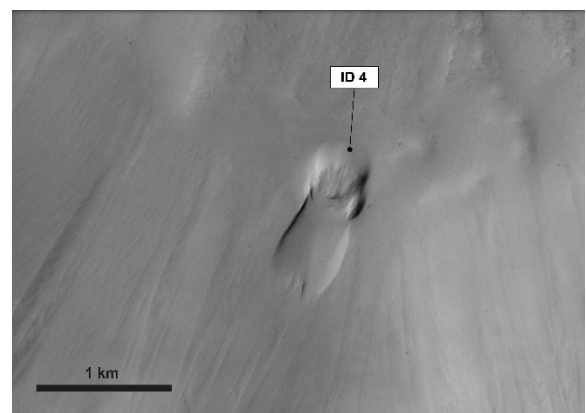

CTX image P19\_008604\_1741\_XI\_05S101W

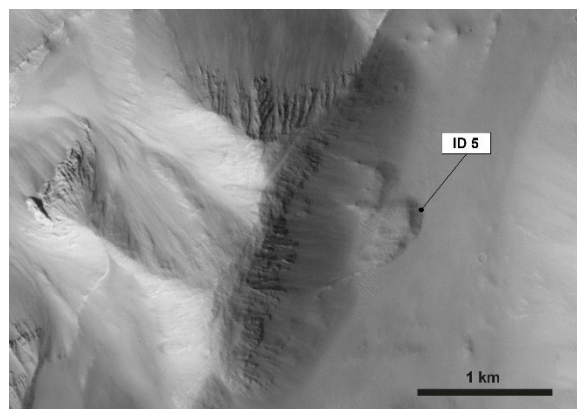

CTX image P17\_007628\_1753\_XN\_04S090W

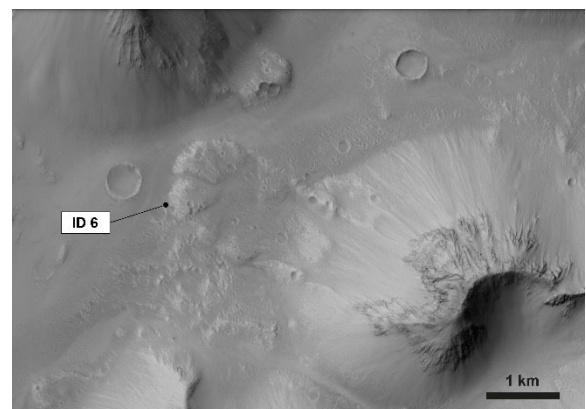

CTX image P17\_007628\_1753\_XN\_04S090W



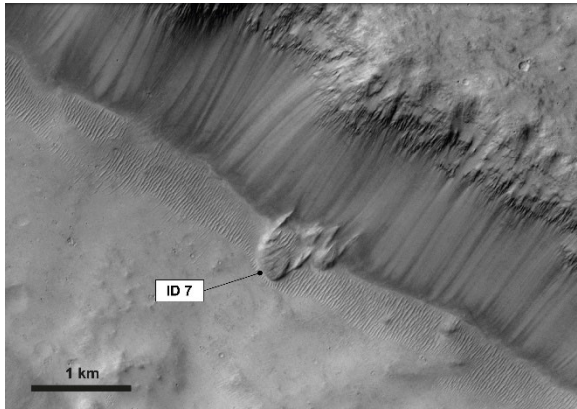

CTX image B20\_017522\_1751\_XN\_04S216W

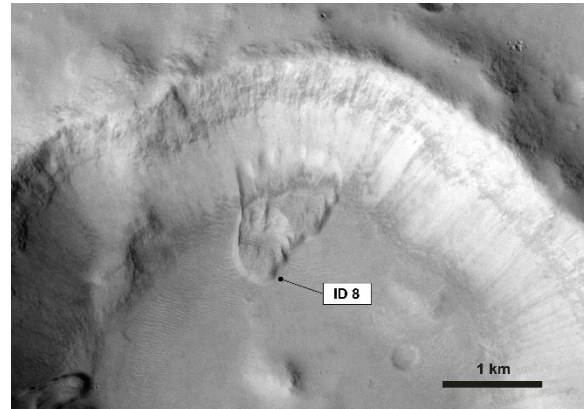

CTX image P07\_003835\_1736\_XN\_06S211W

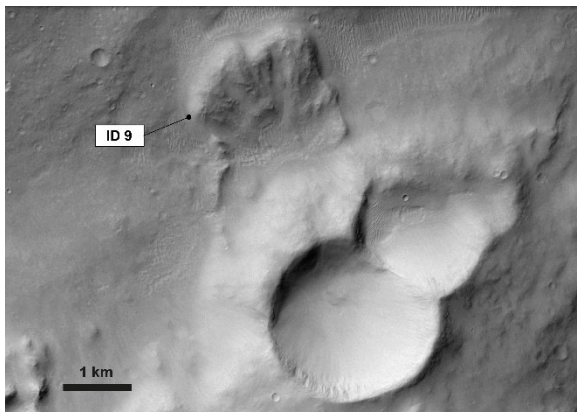

CTX image P22\_009571\_1756\_XI\_04S222W

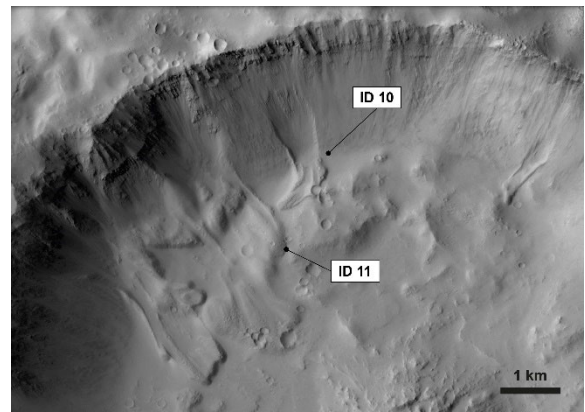

CTX image P22\_009820\_1992\_XI\_19N186W

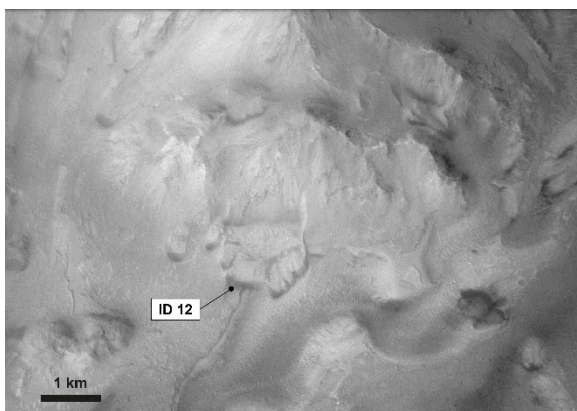

CTX image P11\_005425\_1774\_XN\_02S060W

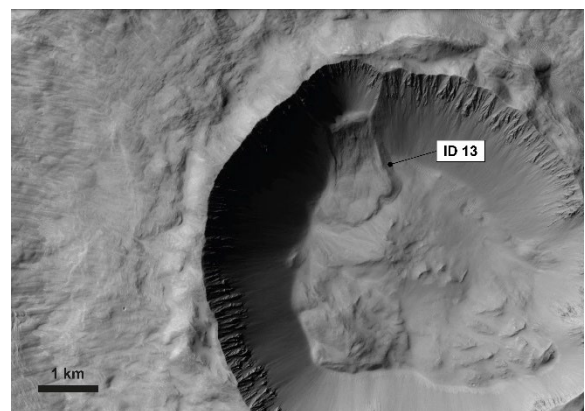

CTX image B20\_017259\_1776\_XN\_02S236W

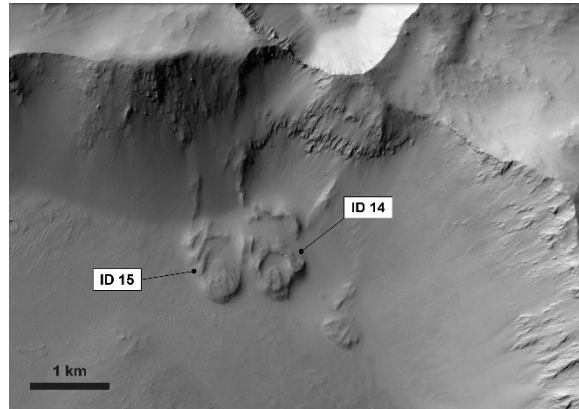

CTX image B19\_016901\_1663\_XI\_13S179W

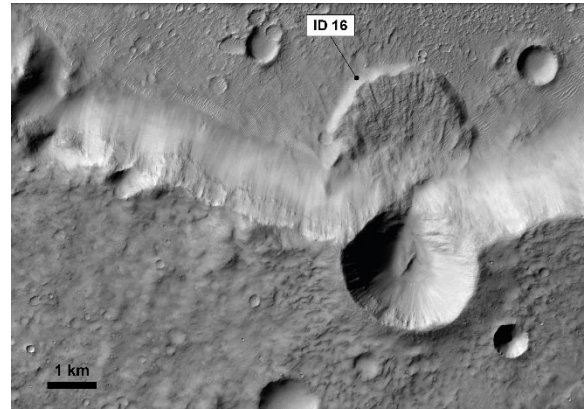

CTX image F01\_036324\_1610\_XN\_19S171W

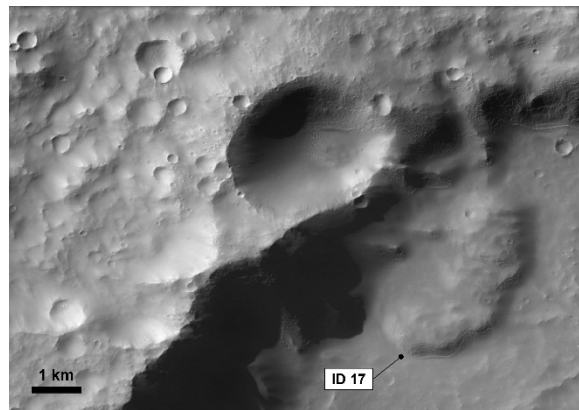

CTX image P16\_007446\_1477\_XN\_32S157W

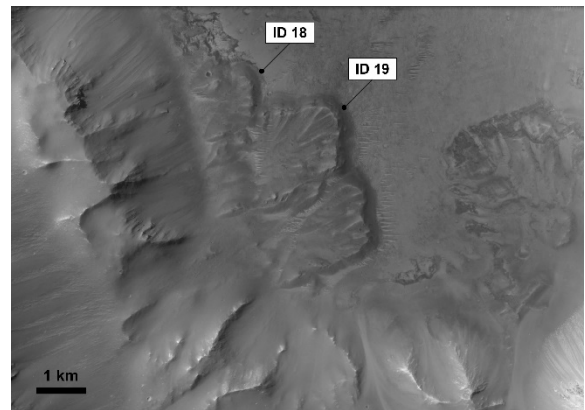

CTX image J03\_045895\_1720\_XN\_08S095W

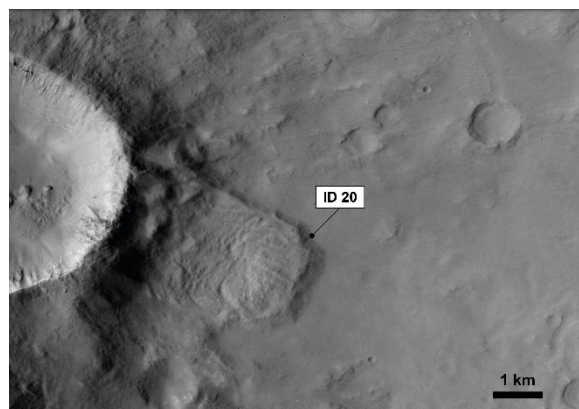

CTX image N07\_064914\_1499\_XN\_30S204W

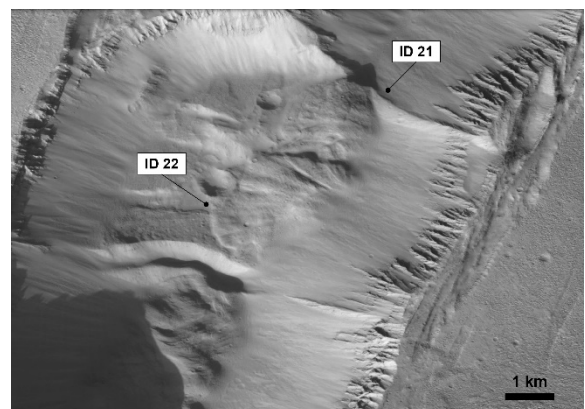

CTX image B10\_013720\_2164\_XN\_36N103W

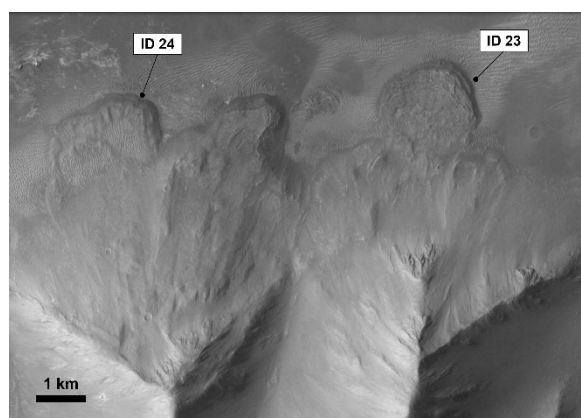

CTX image P03\_002208\_1748\_XN\_05S072W

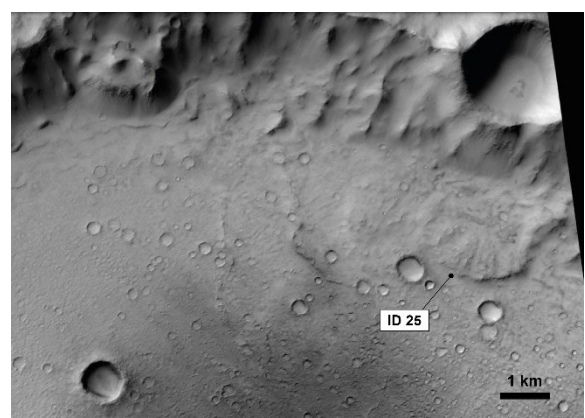

CTX image D18\_034070\_1614\_XN\_18S194W

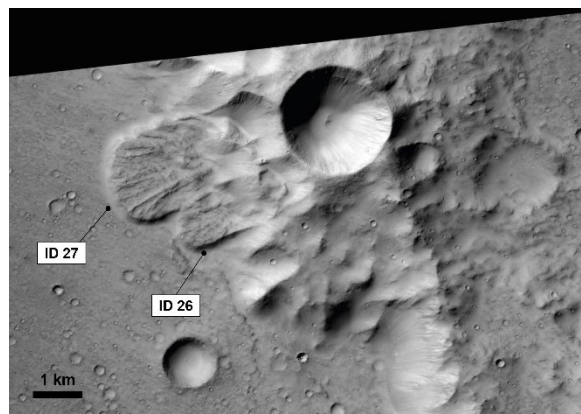

CTX image G20\_025947\_1573\_XN\_22S187W

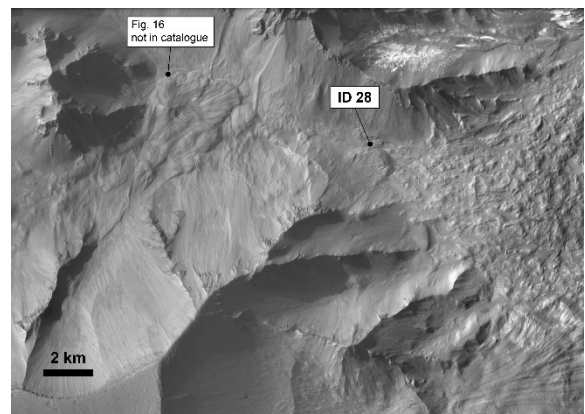

CTX image P01\_001337\_1757\_XN\_04S063W

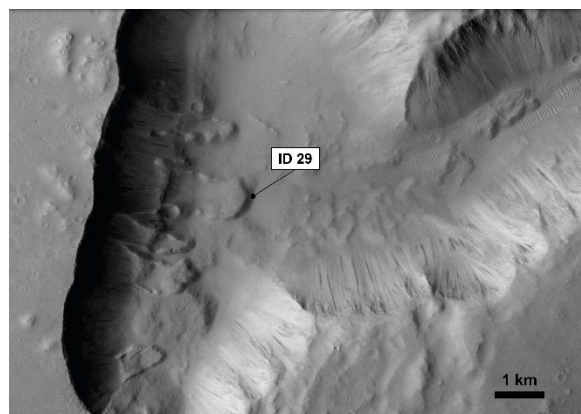

CTX image  
F03\_036887\_2033\_XN\_23N067W

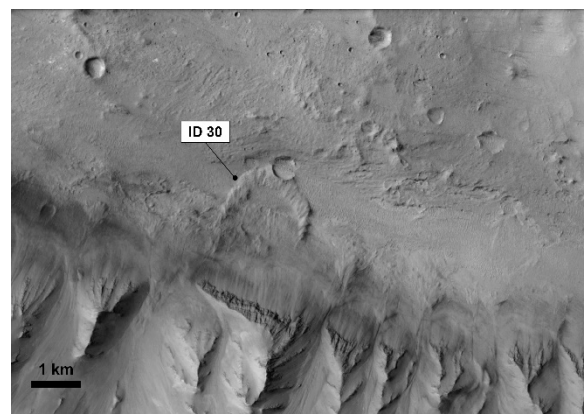

CTX image  
P14\_006467\_1675\_XN\_12S068W

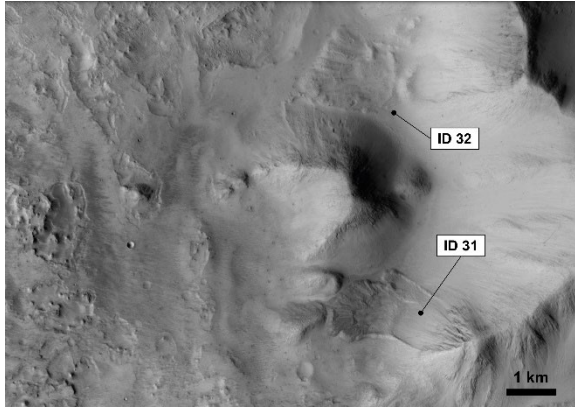

CTX image  
P06\_003382\_1737\_XI\_06S084W

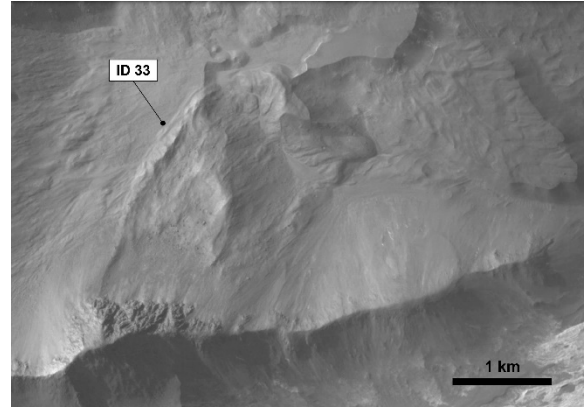

CTX image  
P01\_001337\_1757\_XN\_04S063W

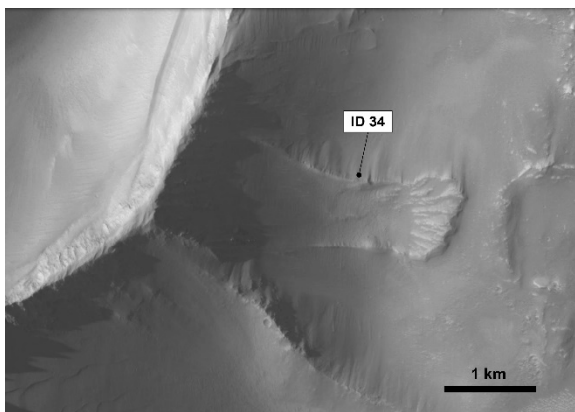

CTX image  
P03\_002288\_1716\_XN\_08S096W

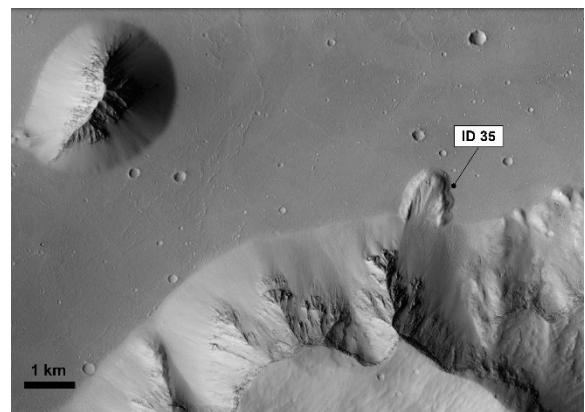

CTX image  
P06\_003516\_1534\_XI\_26S139W

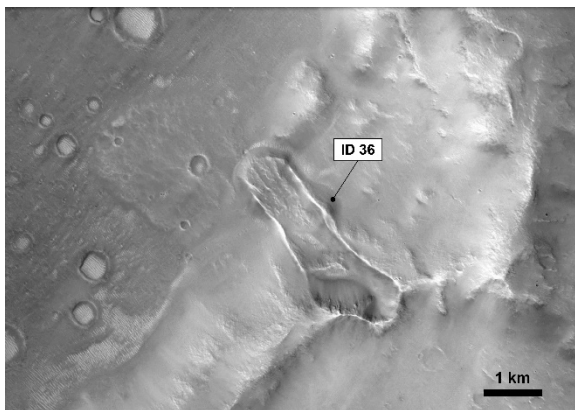

CTX image  
P07\_003770\_1686\_XI\_11S236W

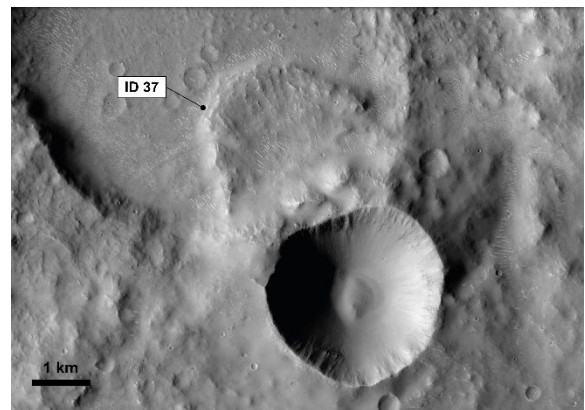

CTX image  
G05\_020015\_1822\_XN\_02N239W

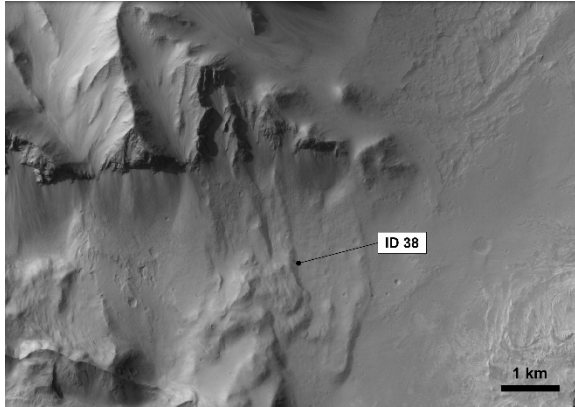

CTX image  
P18\_007957\_1744\_XI\_05S074W

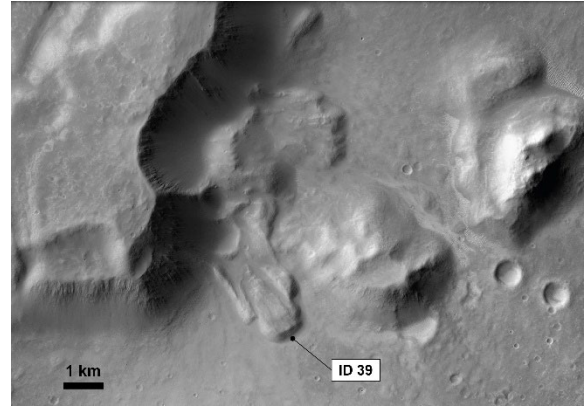

CTX image  
P18\_008134\_1839\_XN\_03N228W

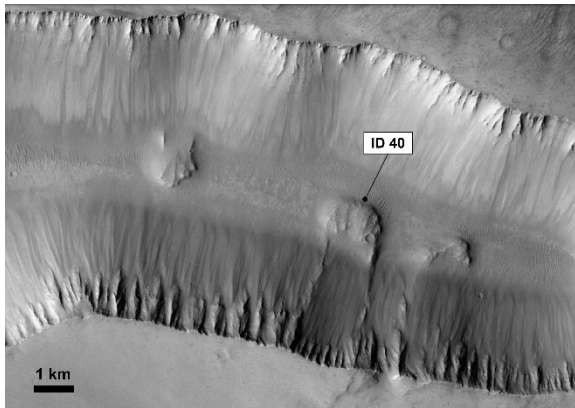

CTX image  
P05\_002802\_1735\_XI\_06S089W

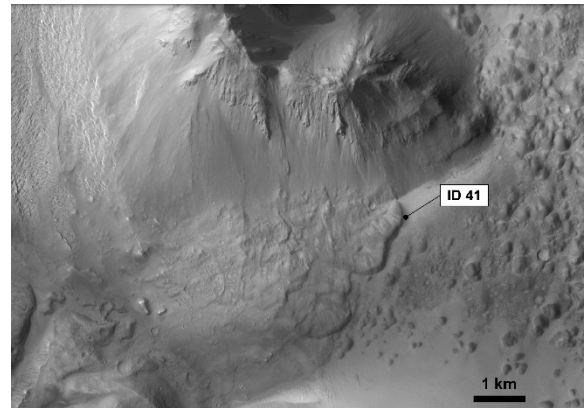

CTX image  
P02\_001997\_1744\_XN\_05S072W

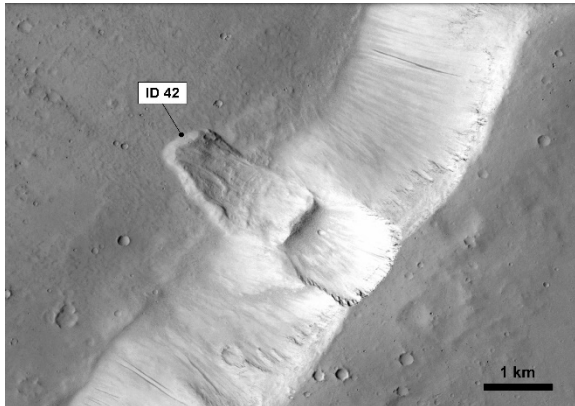

CTX image  
P19\_008260\_2078\_XN\_27N071W

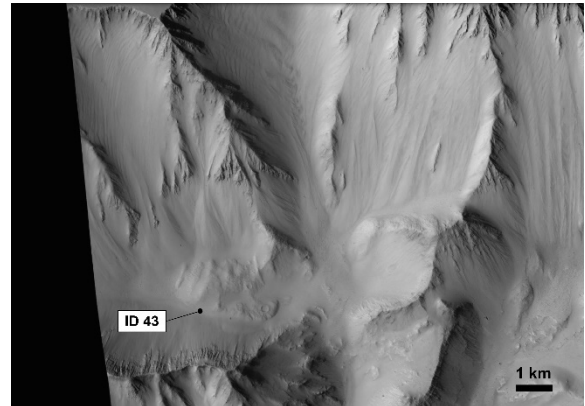

CTX image  
P05\_002947\_1744\_XN\_05S088W

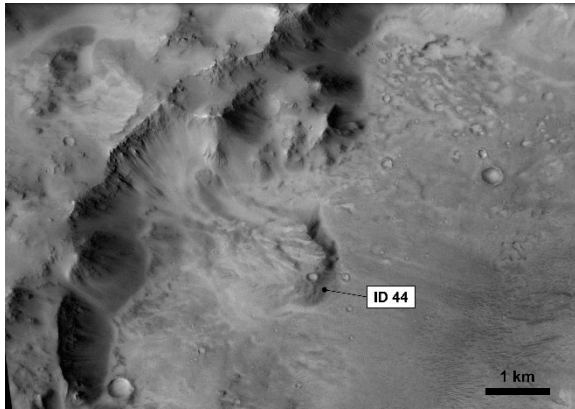

CTX image  
B09\_013196\_1581\_XI\_21S190W

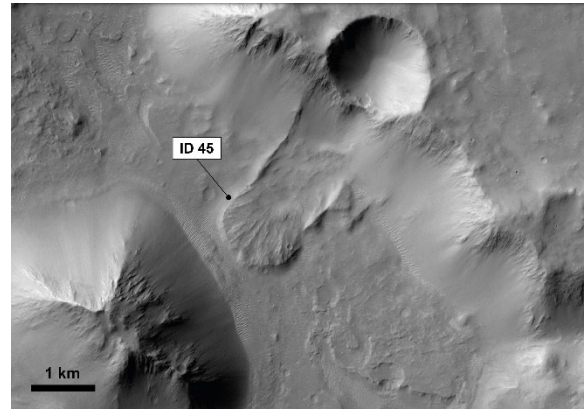

CTX image  
B20\_017285\_1748\_XN\_05S225W

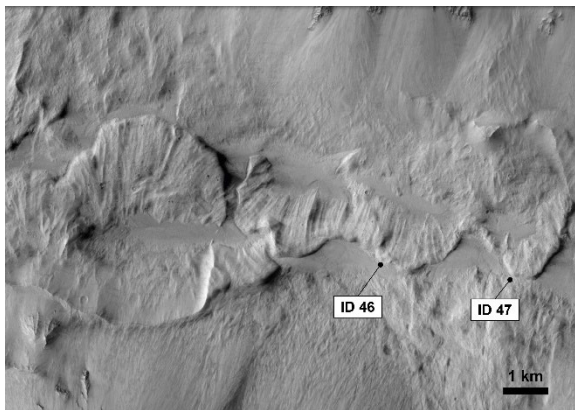

CTX image  
P14\_006546\_1670\_XN\_13S065W

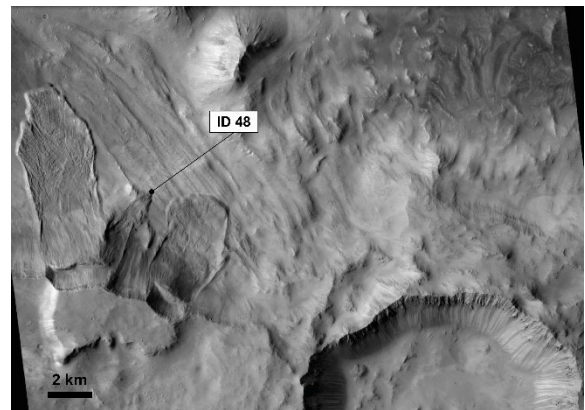

CTX image  
P02\_001957\_1807\_XN\_00N060W

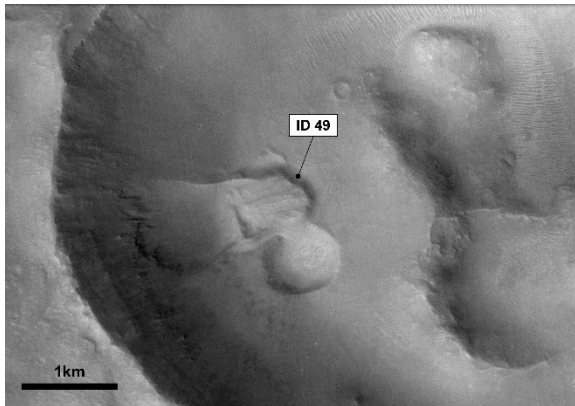

CTX image  
P11\_005451\_1970\_XN\_17N052W

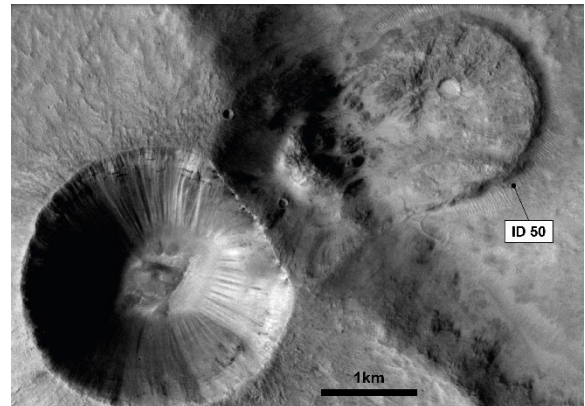

CTX image  
J15\_050548\_1861\_XN\_06N055W

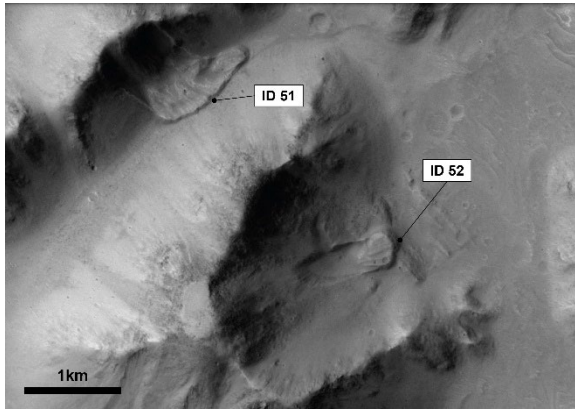

CTX image  
P16\_007244\_1796\_XN\_00S045W

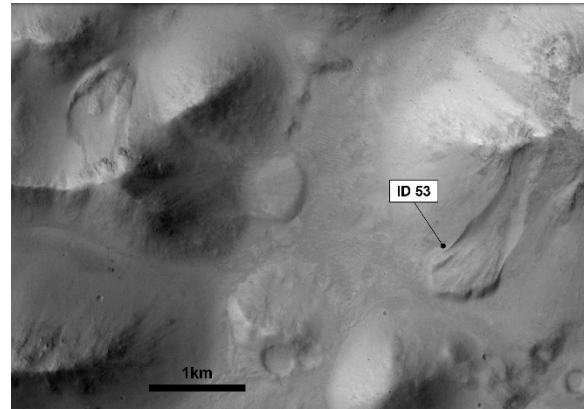

CTX image  
P16\_007244\_1796\_XN\_00S045W

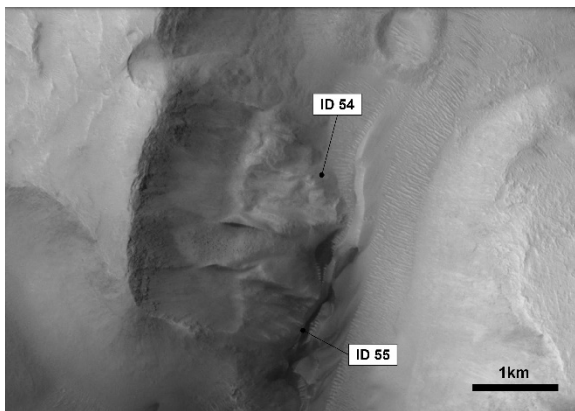

CTX image  
P16\_007244\_1796\_XN\_00S045W

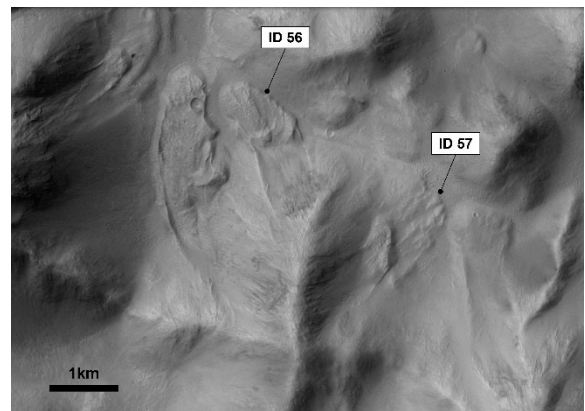

CTX image  
P20\_008826\_1796\_XN\_00S044W

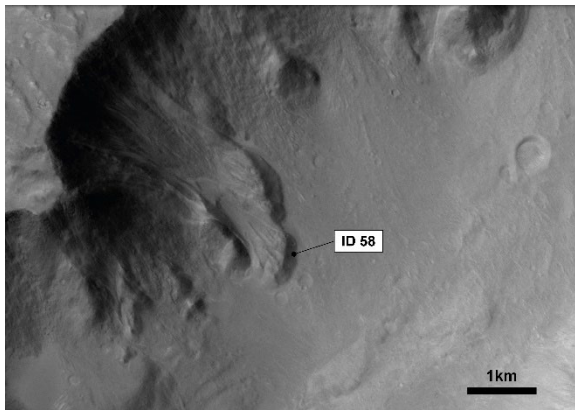

CTX image  
P02\_001930\_1834\_XI\_03N043W

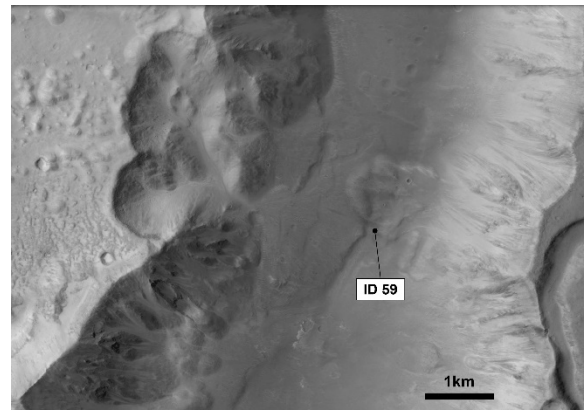

CTX image  
B18\_016698\_1866\_XN\_06N042W

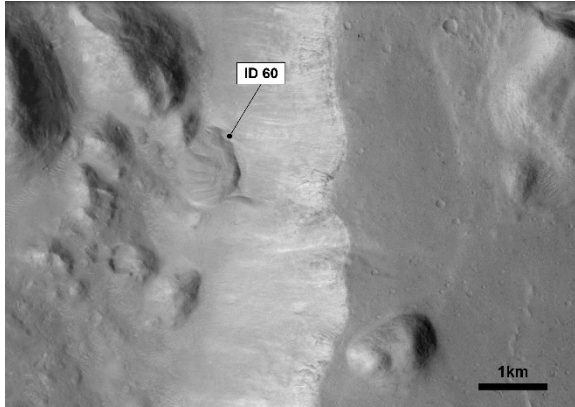

CTX image  
B05\_011674\_1901\_XN\_10N041W

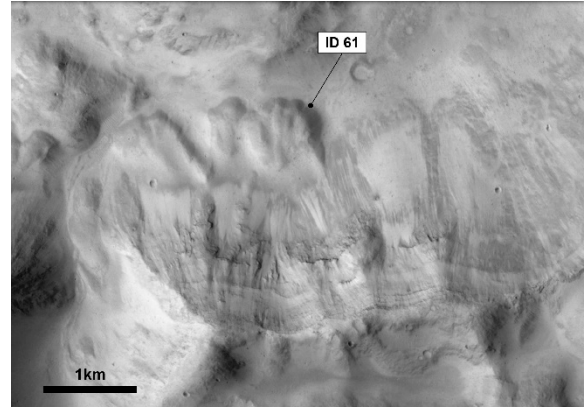

CTX image  
F03\_037097\_1891\_XN\_09N041W

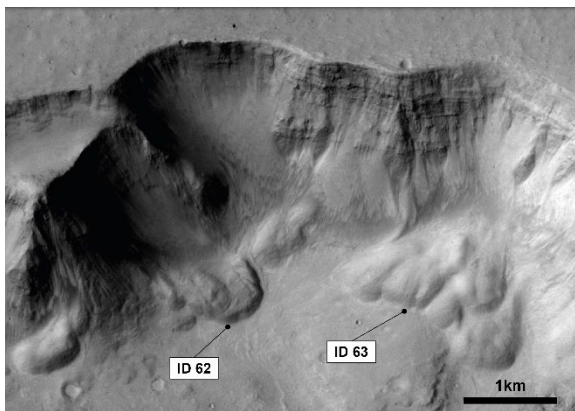

CTX image  
F03\_037097\_1891\_XN\_09N041W

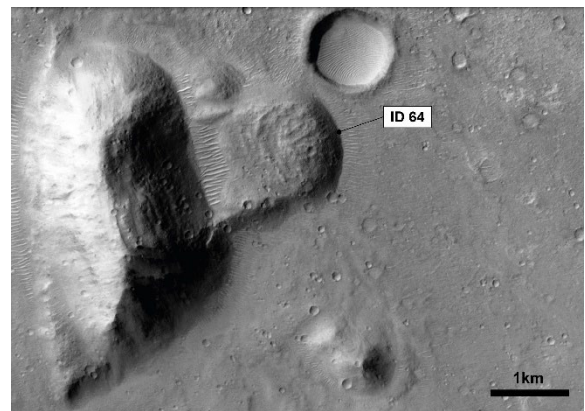

CTX image  
B19\_017133\_1914\_XN\_11N038W

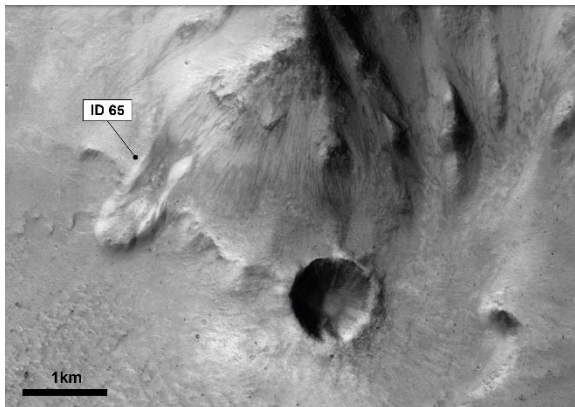

CTX image  
P05\_002800\_1814\_XI\_01N035W

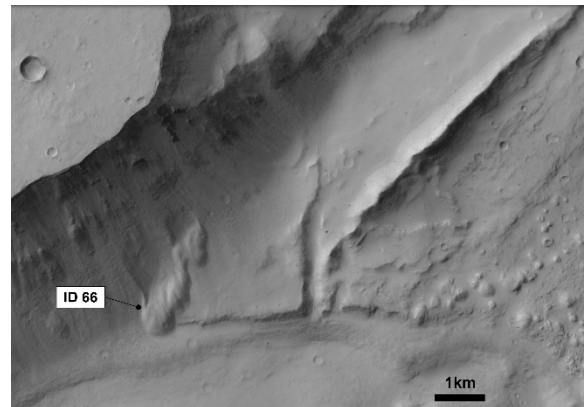

CTX image  
P19\_008417\_1807\_XN\_00N036W



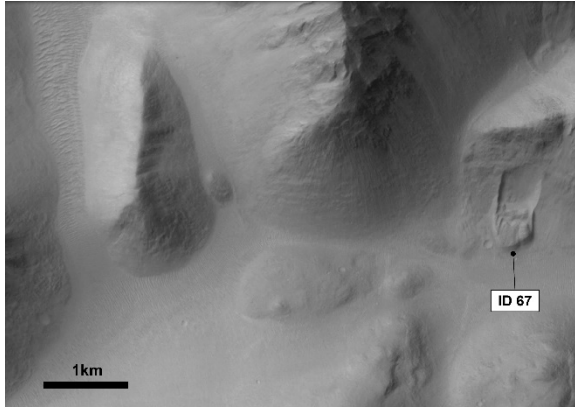

CTX image  
P19\_008417\_1807\_XN\_00N036W

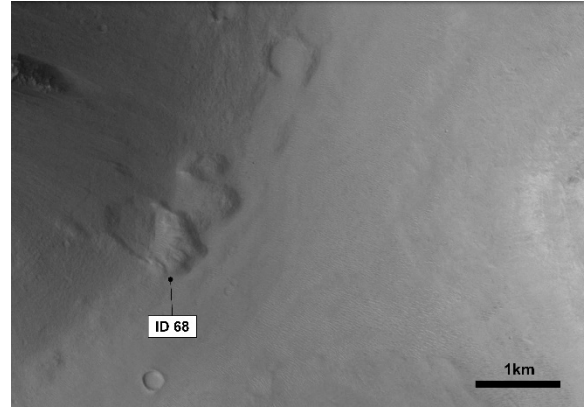

CTX image  
P05\_002800\_1814\_XI\_01N035W

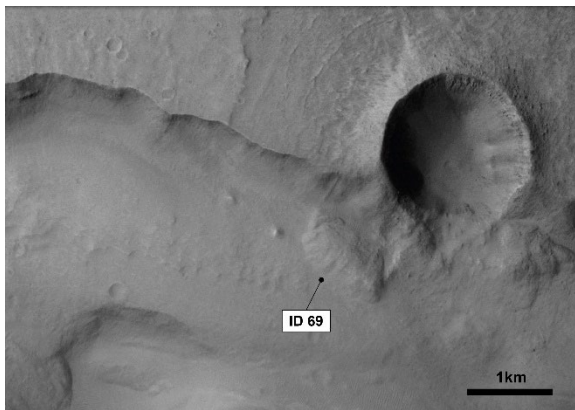

CTX image  
P02\_002022\_1801\_XN\_00N035W

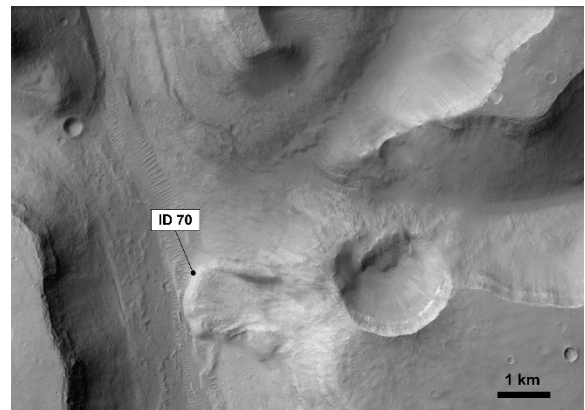

CTX image  
B22\_018201\_1816\_XN\_01N035W

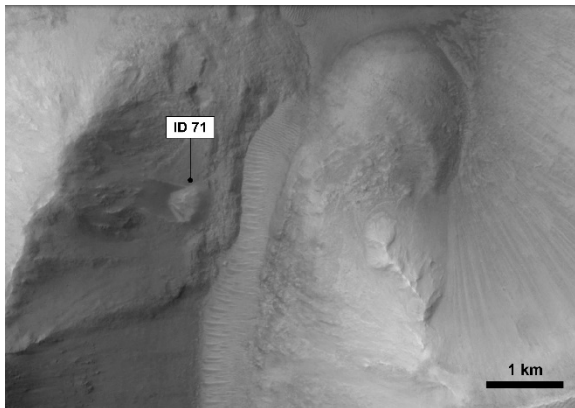

CTX image  
B19\_017001\_1789\_XN\_01S032W

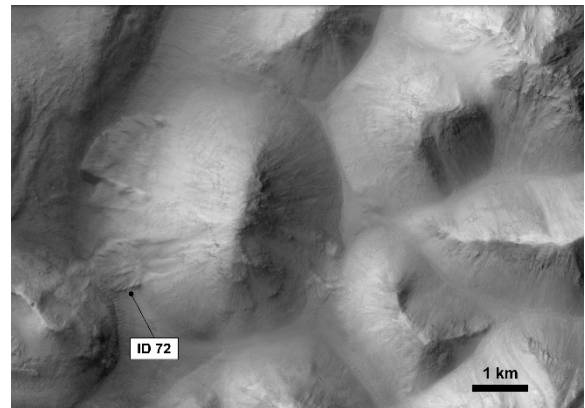

CTX image  
P16\_007349\_1831\_XN\_03N032W

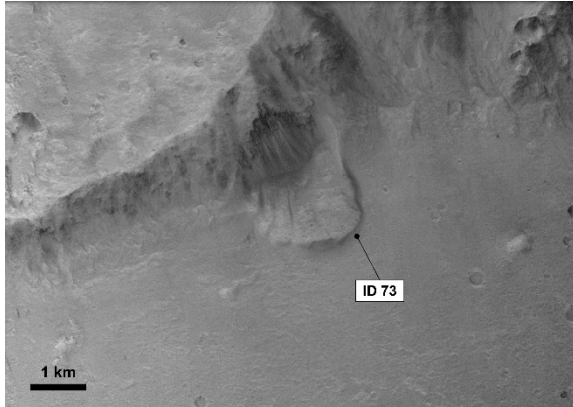

CTX image  
P11\_005358\_1875\_XN\_07N032W

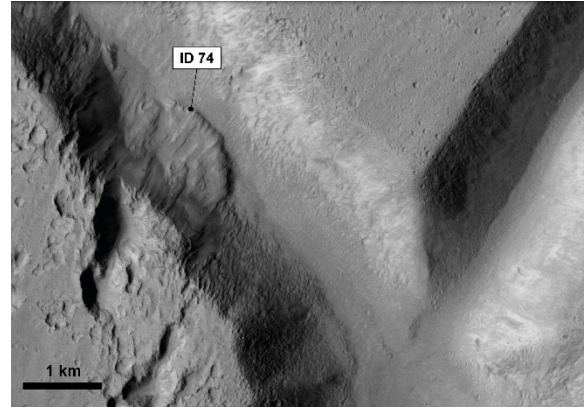

CTX image  
B03\_010777\_1920\_XN\_12N032W

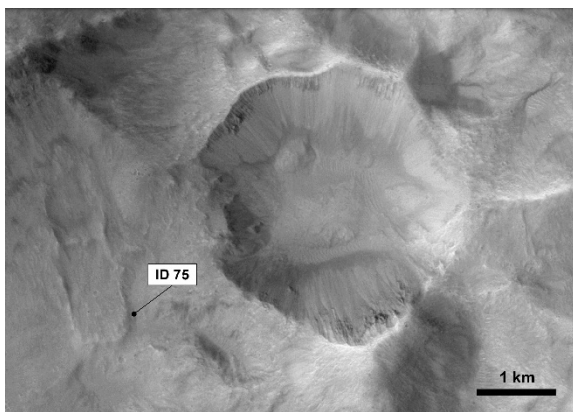

CTX image  
P11\_005516\_1812\_XI\_01N025W

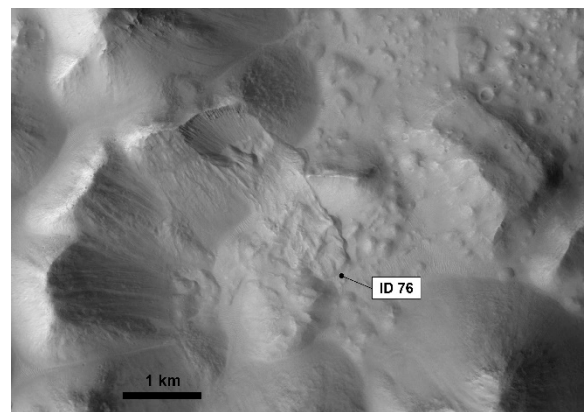

CTX image  
P07\_003960\_1823\_XI\_02N025W

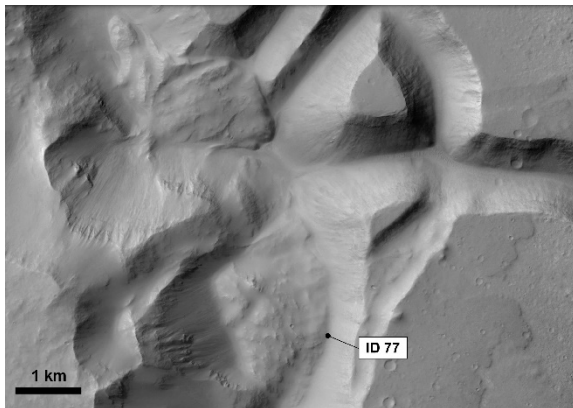

CTX image  
K22\_061835\_1819\_XI\_01N023W

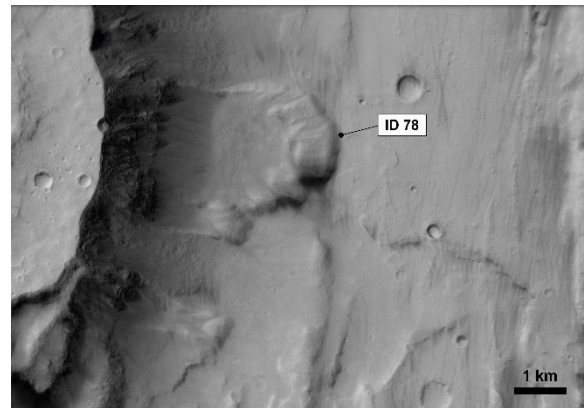

CTX image  
P15\_006887\_1839\_XN\_03N017W

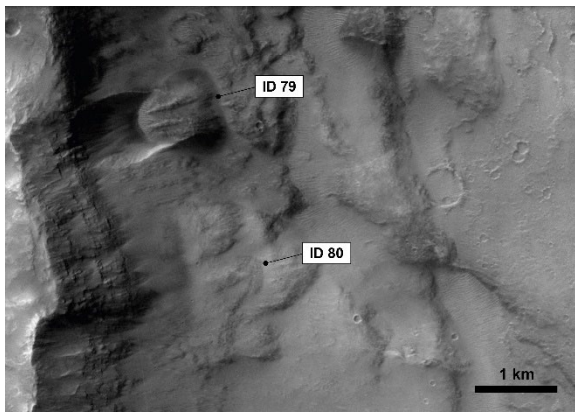

CTX image  
D18\_034103\_1818\_XI\_01N017W

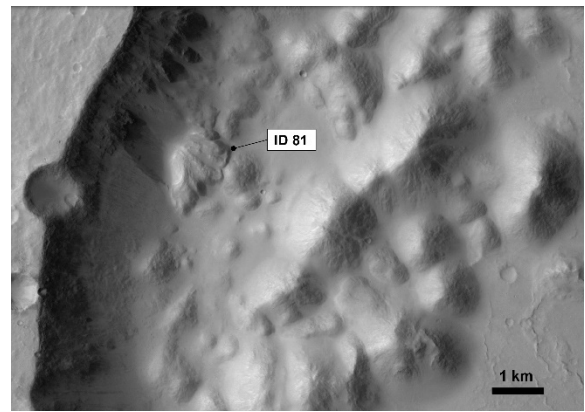

CTX image  
P02\_001995\_1794\_XN\_00S018W

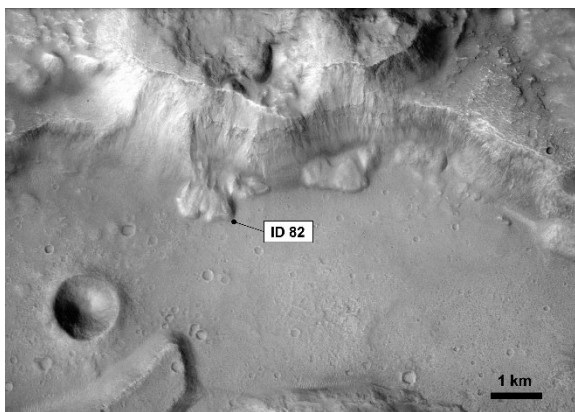

CTX image  
P06\_003485\_1826\_XN\_02N016W

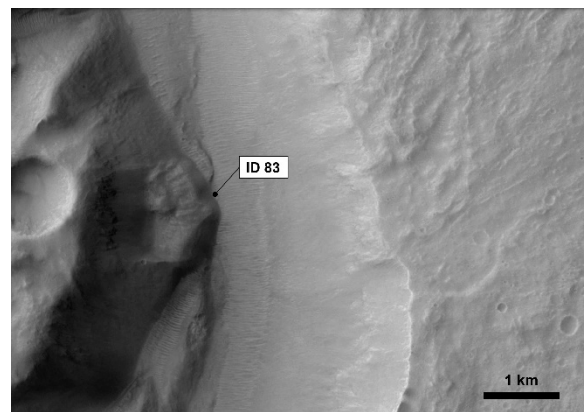

CTX image  
P17\_007665\_1874\_XN\_07N022W

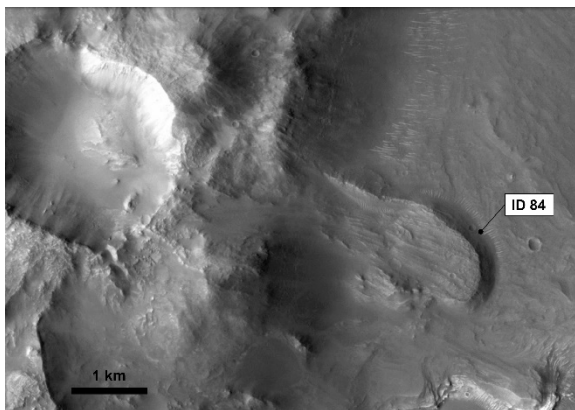

CTX image  
P03\_002176\_2024\_XI\_22N283W

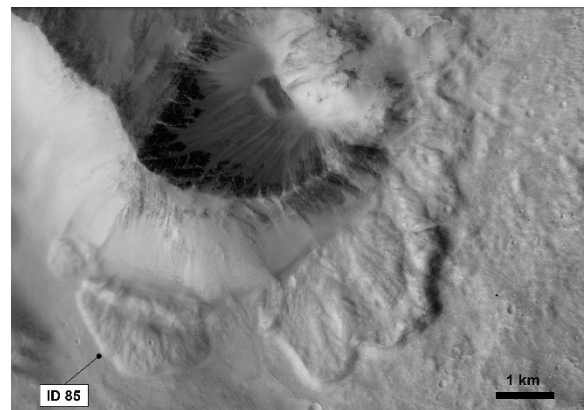

CTX image  
B11\_013766\_1843\_XN\_04N278W

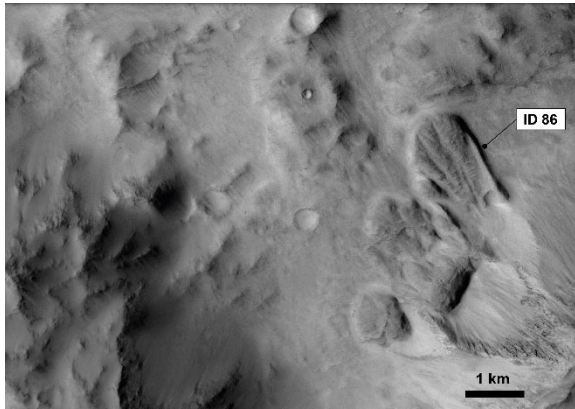

CTX image  
=P15\_006804\_1826\_XN\_02N271W

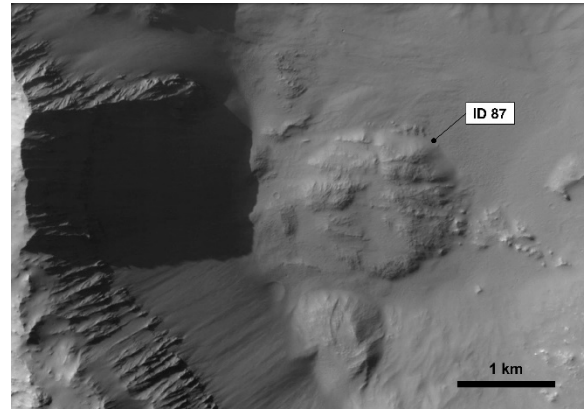

CTX image  
B19\_016958\_1563\_XN\_23S295W

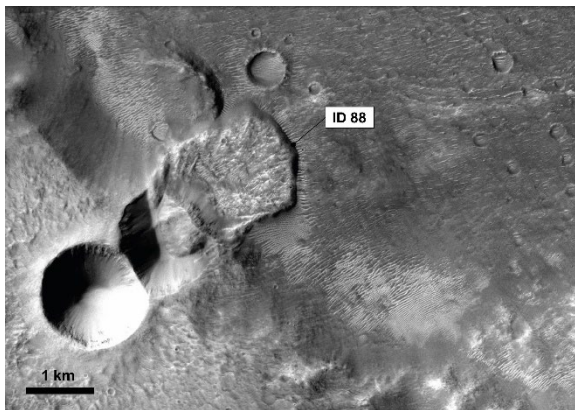

CTX image  
P16\_007450\_1708\_XN\_09S269W

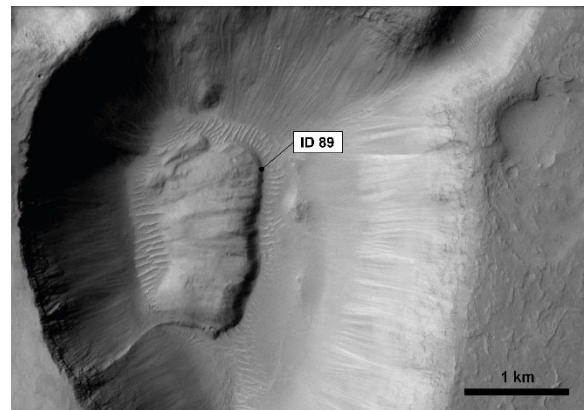

CTX image  
P19\_008286\_1780\_XN\_02S058W

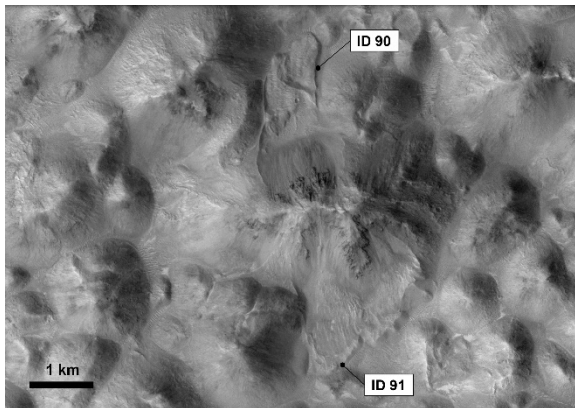

CTX image  
D08\_030280\_1790\_XI\_01S043W

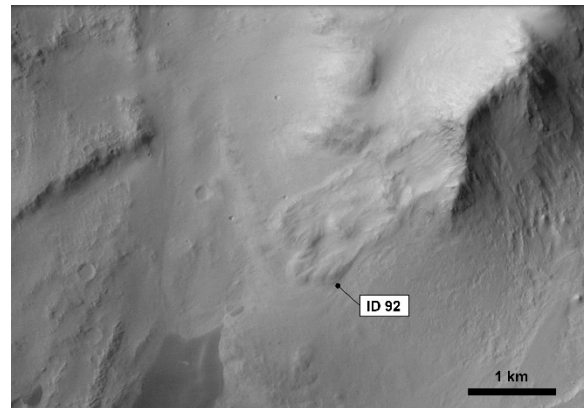

CTX image  
P02\_001706\_1727\_XI\_07S048W

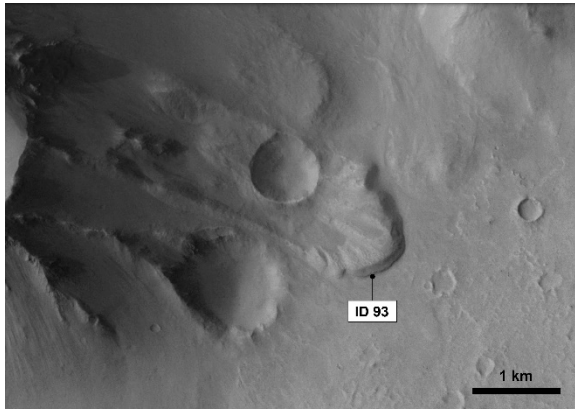

CTX image  
P04\_002484\_1723\_XI\_07S047W

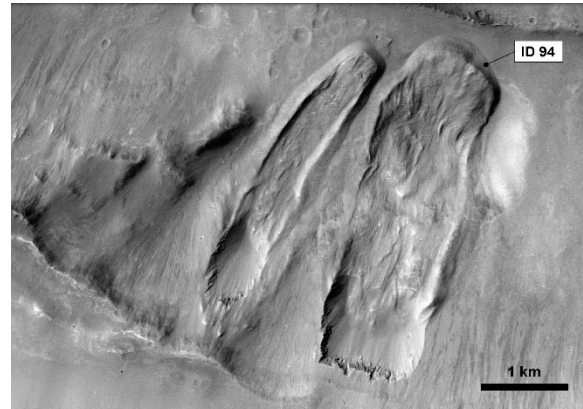

CTX image  
P17\_007811\_1709\_XN\_09S046W

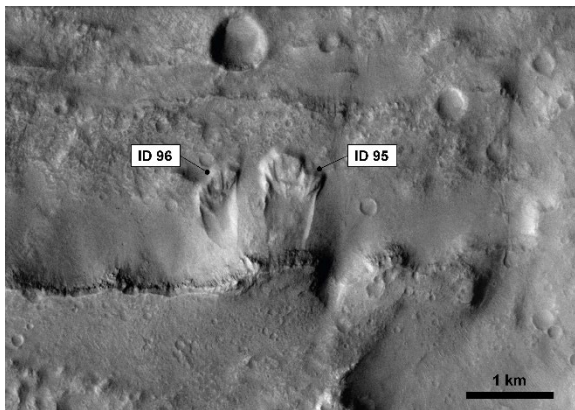

CTX image  
P04\_002642\_1717\_XI\_08S041W

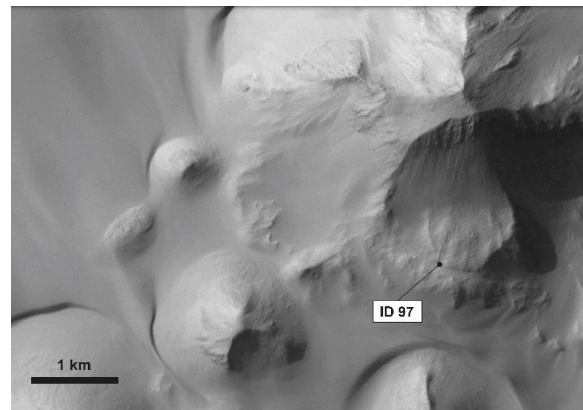

CTX image  
B01\_010026\_1663\_XN\_13S045W

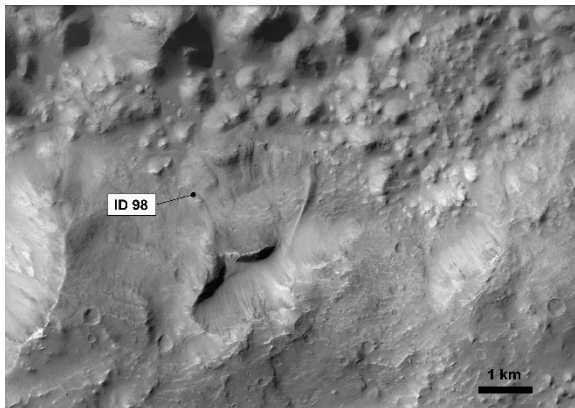

CTX image  
B21\_017885\_1620\_XN\_18S045W

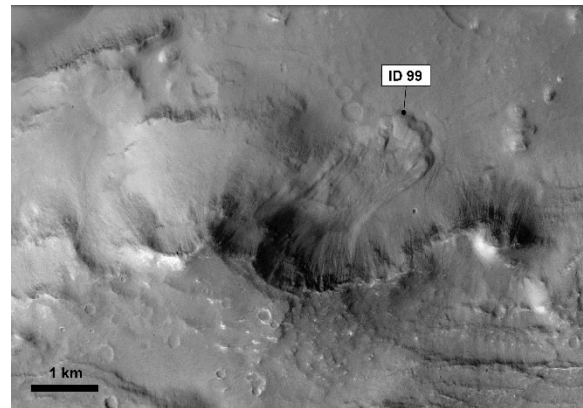

CTX image  
B12\_014351\_1623\_XN\_17S044W

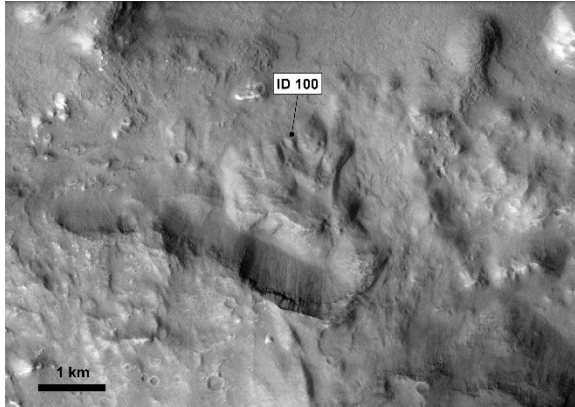

CTX image  
J06\_047304\_1635\_XN\_16S043W

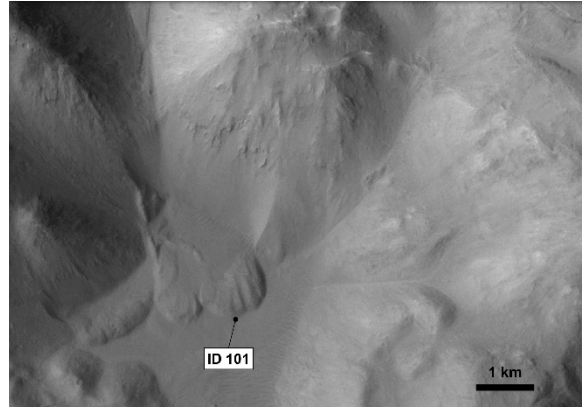

CTX image  
B06\_011819\_1665\_XN\_13S037W

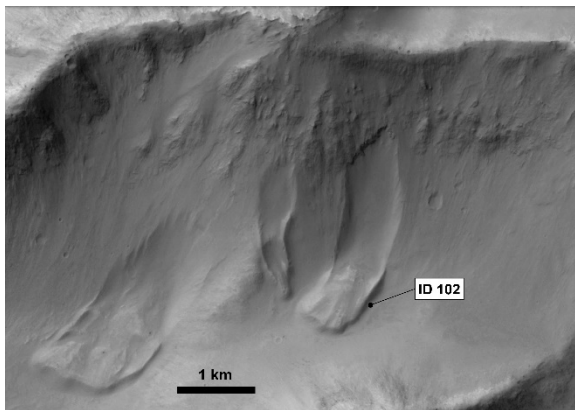

CTX image  
B18\_016632\_1738\_XN\_06S037W

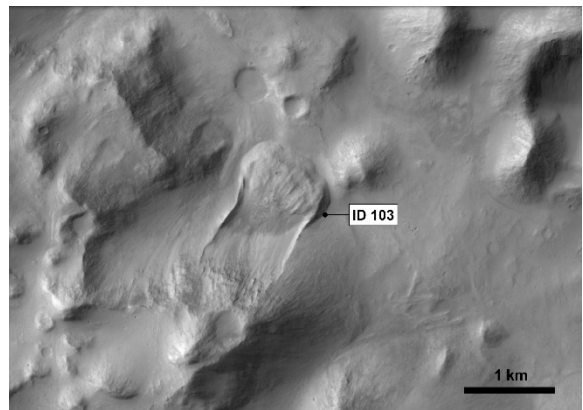

CTX image  
B21\_017766\_1744\_XN\_05S038W

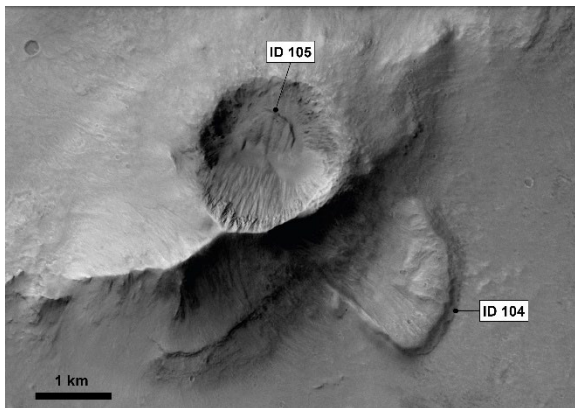

CTX image  
P15\_006980\_1763\_XN\_03S036W

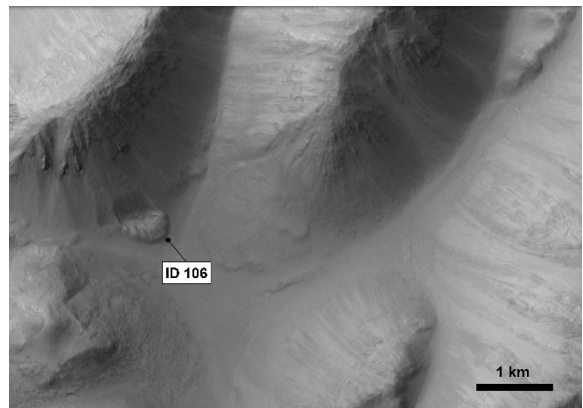

CTX image  
B19\_017001\_1789\_XN\_01S032W

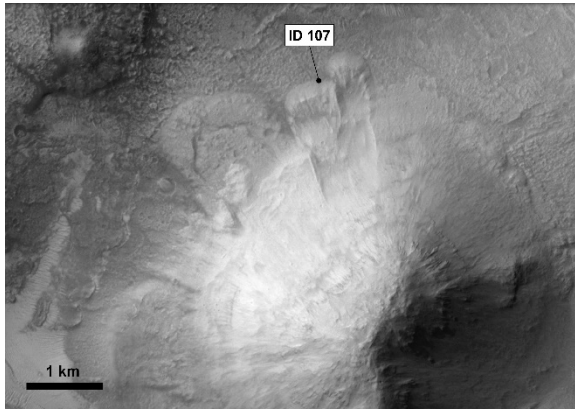

CTX image  
P19\_008641\_1799\_XI\_00S032W

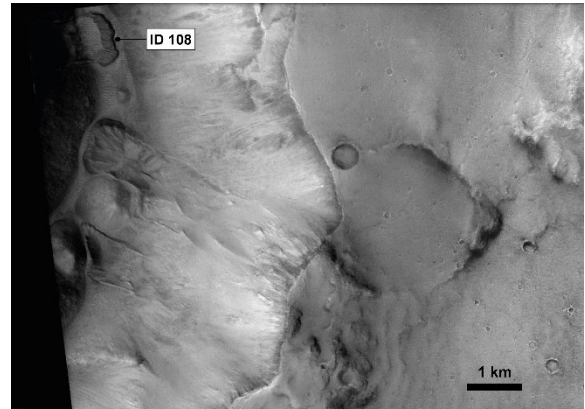

CTX image  
B09\_013137\_1777\_XN\_02S021W

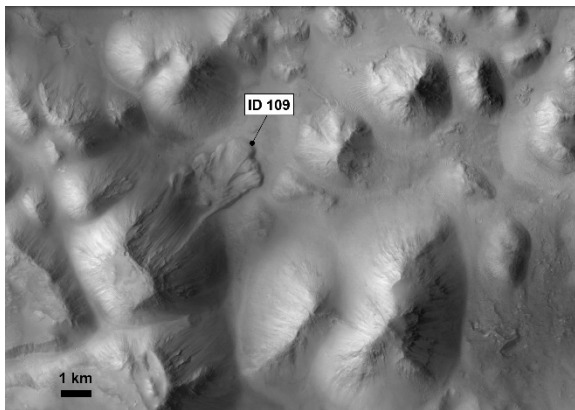

CTX image  
P02\_001929\_1782\_XN\_01S016W

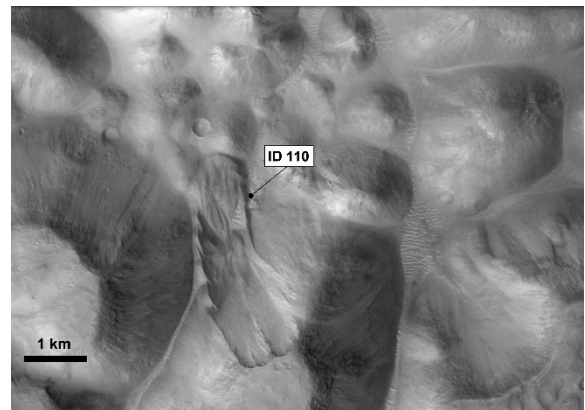

CTX image  
P08\_003973\_1772\_XN\_02S019W

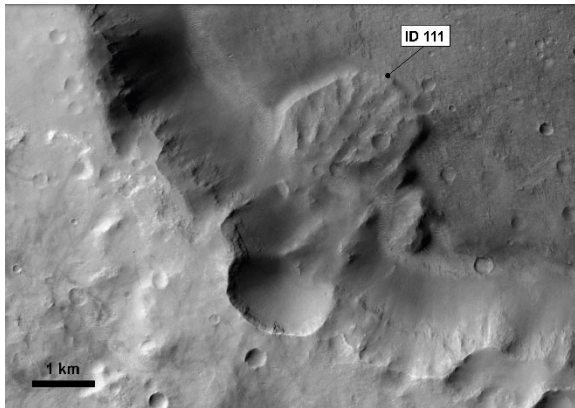

CTX image  
P14\_006531\_1606\_XN\_19S015W

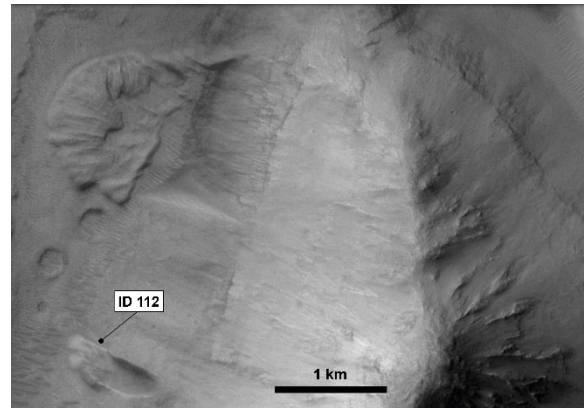

CTX image  
P16\_007349\_1831\_XN\_03N032W
